# Supplementary material for: Microwave-assisted synthesis of novel 2,3-disubstituted imidazo[1,2-a]pyridines via one-pot three component reactions
Source: Royal Society of Chemistry journal article supplement (doi:10.1039/c4ra16298f), 2015-01-01

# Supporting information

## Microwave-assisted synthesis of novel 2, 3-disubstituted imidazo[1,2-a]pyridines via one-pot three component reactions

Shaik Karamthulla, Md. Nasim Khan, and Lokman H. Choudhury\*  
Department of Chemistry, Indian Institute of Technology Patna, Patna-800013,  
India.  
E-mail: [lokman@iitp.ac.in](mailto:lokman@iitp.ac.in)

### Table of contents

|                                                                             |        |
|-----------------------------------------------------------------------------|--------|
| 1. General information.....                                                 | S2     |
| 2. Typical experimental procedure for the synthesis of 1a.....              | S2     |
| 3. Copies of $^1\text{H}$ and $^{13}\text{C}$ NMR spectra of compounds..... | S3-S24 |

## 1. General information.

All starting materials were purchased either from Sigma Aldrich or Alfa Aesar and used without further purification. NMR spectra were recorded on 400 or 500 MHz for  $^1\text{H}$  and 100 or 125 MHz for  $^{13}\text{C}$  in  $\text{D}_2\text{O}$  or  $\text{DMSO-d}_6$ , Chemical shift values were reported in  $\delta$  values (ppm) downfield from tetramethylsilane. Infrared (IR) spectra were recorded on a Shimadzu IR Affinity-1, FTIR spectrometer. Elemental analyses were carried out using vario MICRO cube elemental analyzer. Microwave irradiation was carried out with Initiator 2.5 Microwave Synthesizers from Biotage, Uppsala, Sweden. Melting points were recorded by using SRS EZ-Melt automated melting point apparatus by capillary methods and uncorrected.

## 2. Typical experimental procedure for the synthesis of **1a**.

A mixture of phenylglyoxal monohydrate (**1a**) (1 mmol), 4-hydroxycoumarin (**2a**) (1 mmol), 2-aminopyridine (**3a**) (1 mmol) and iodine (0.3 mmol) in 3 mL ethanol was introduced in a 2-5 mL reaction vial, the mixture was irradiated for 15 min, keeping temperature at 130 °C (Absorption Level: High; Fixed Hold Time and 200 W). The reaction mixture was then cooled to room temperature and the solid was filtered off, and was washed with water-ethanol mixture to get the desired three component product **4a**.

Due to poor solubility of these compounds in common organic solvents, in most of the cases the resultant products were treated with 1.0 equivalent NaOH in 2 ml  $\text{H}_2\text{O}$  to prepare the corresponding sodium enolate of the products and the solvent was removed under vacuum to record NMR in  $\text{D}_2\text{O}$ .

### 3. Copies of $^1\text{H}$ and $^{13}\text{C}$ NMR spectra of compounds

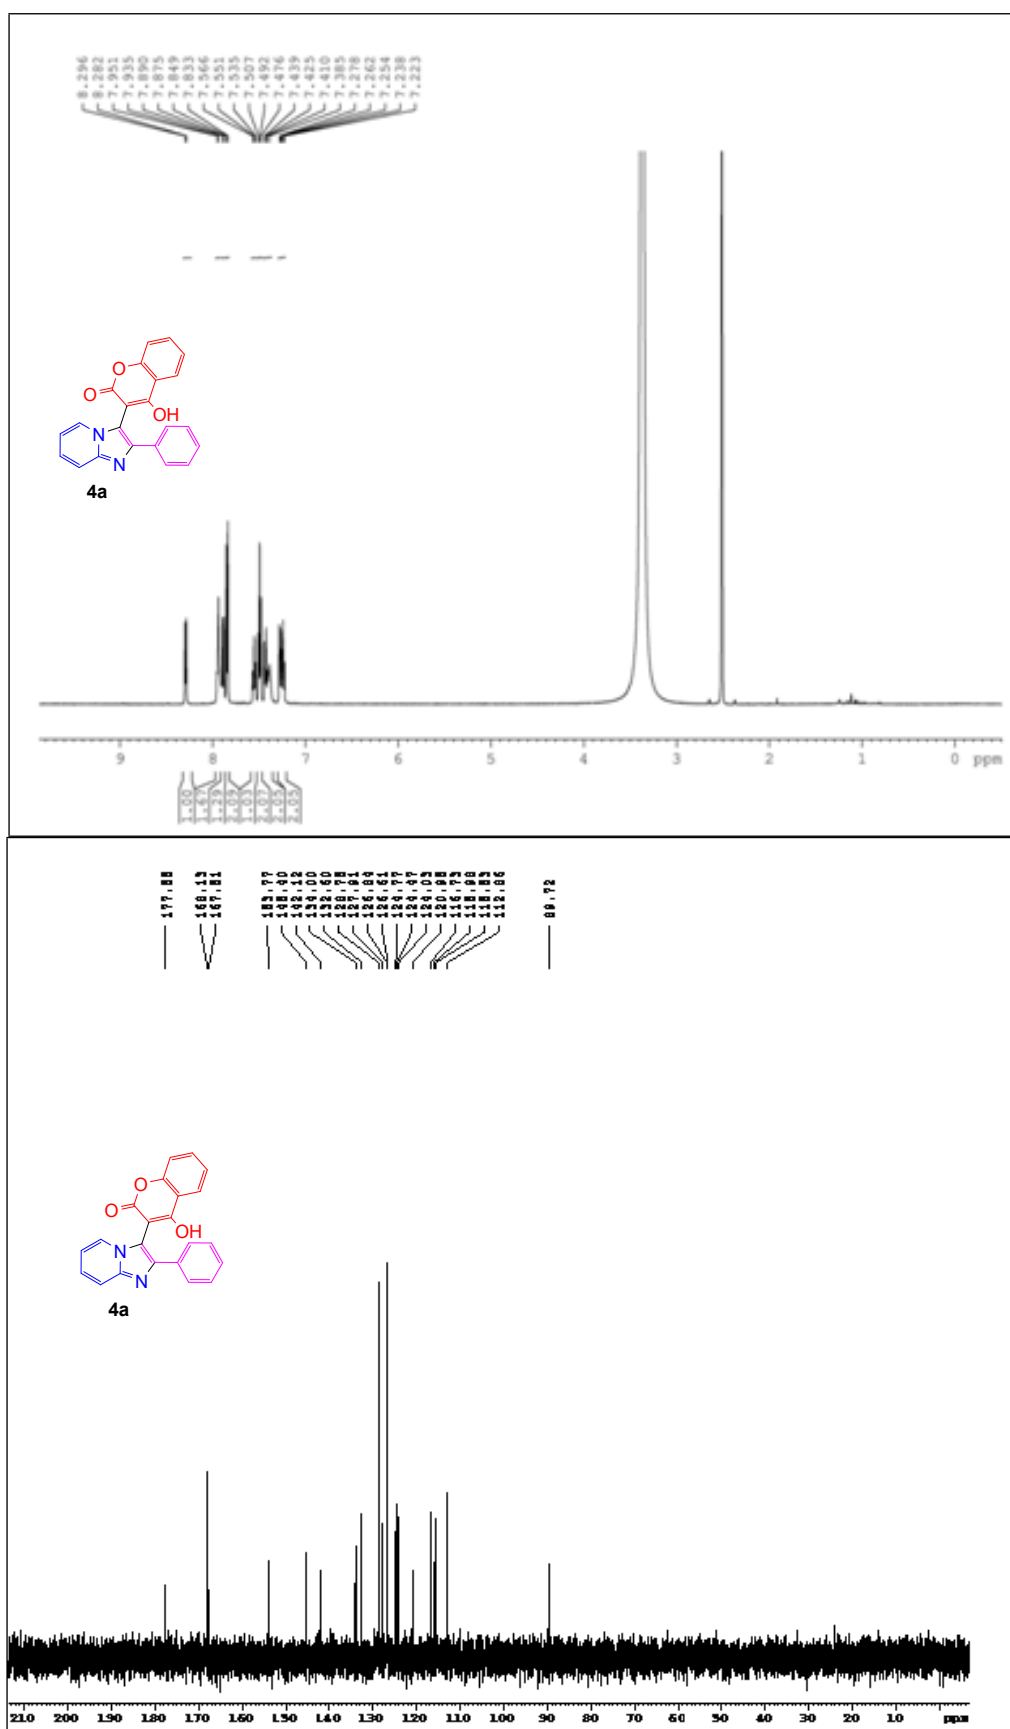



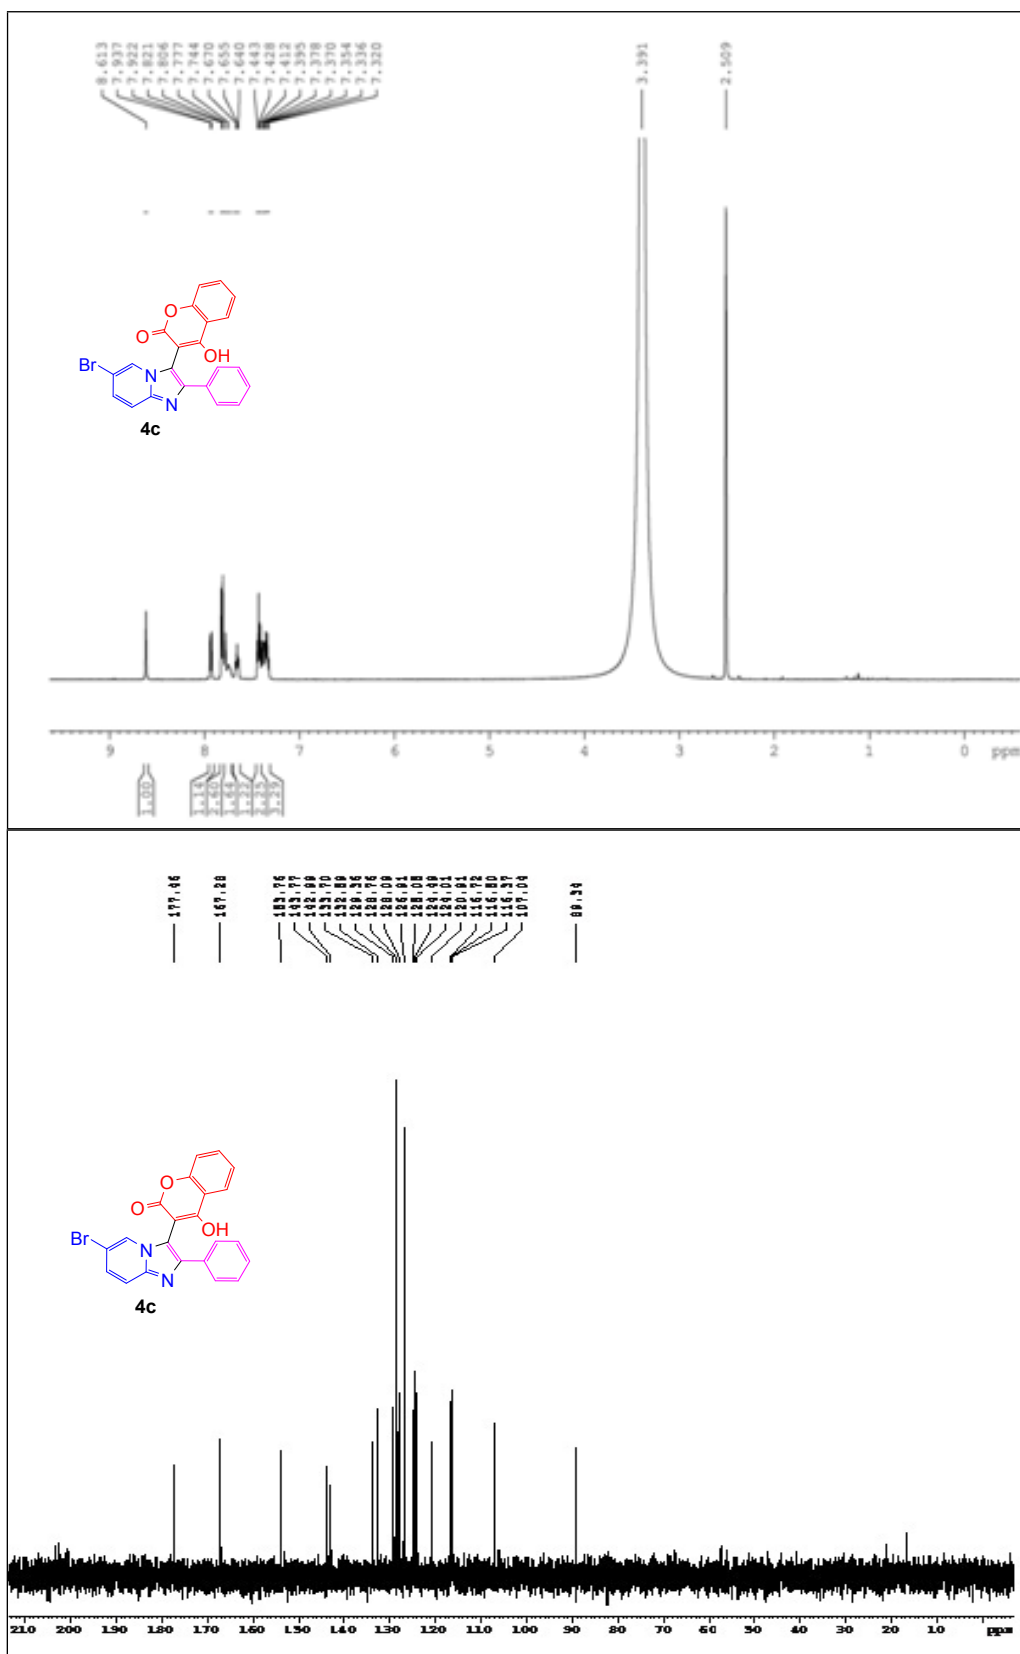

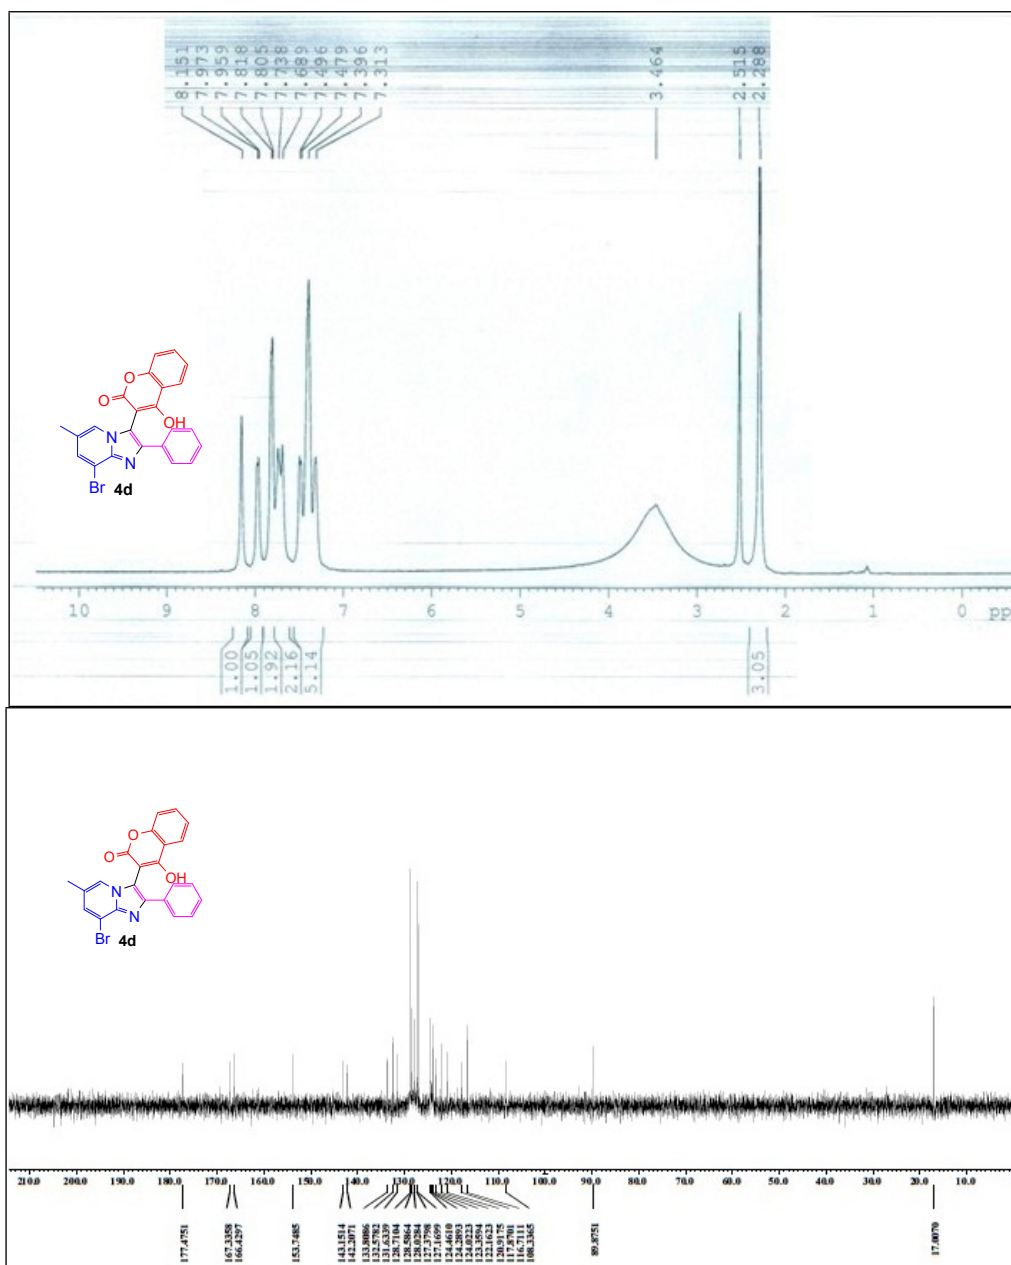

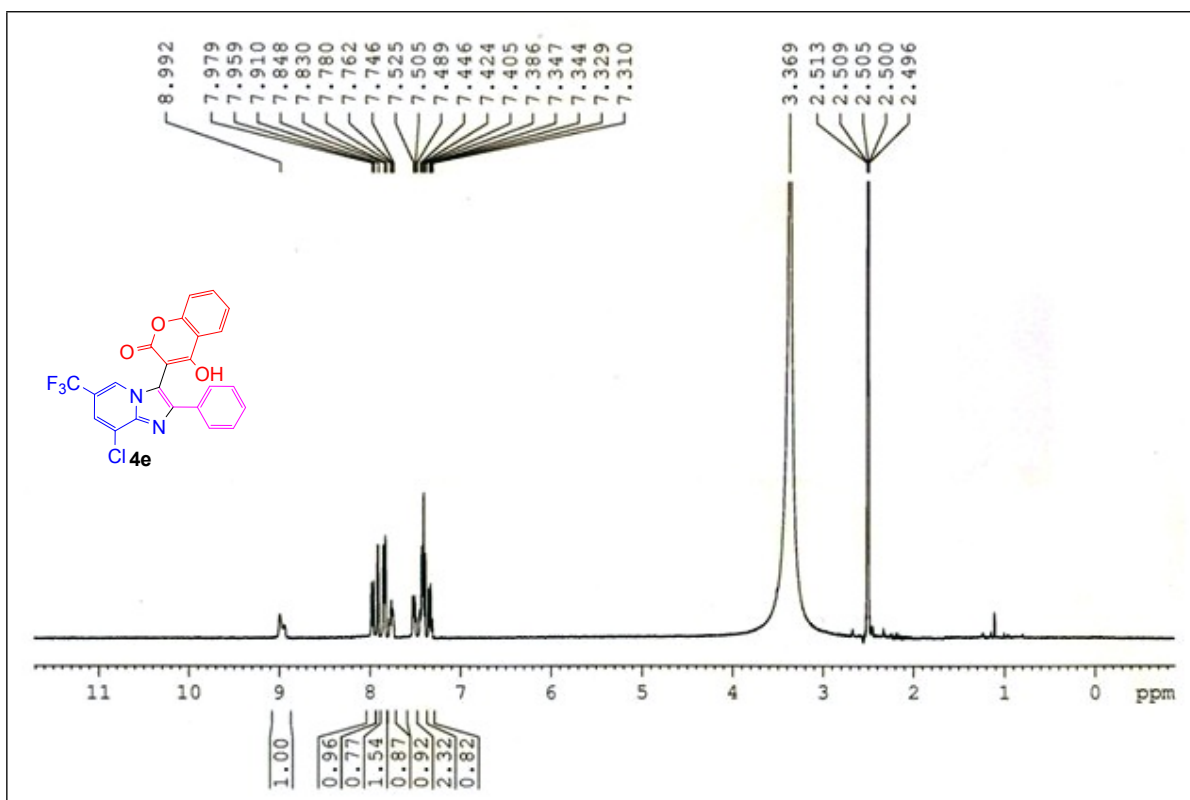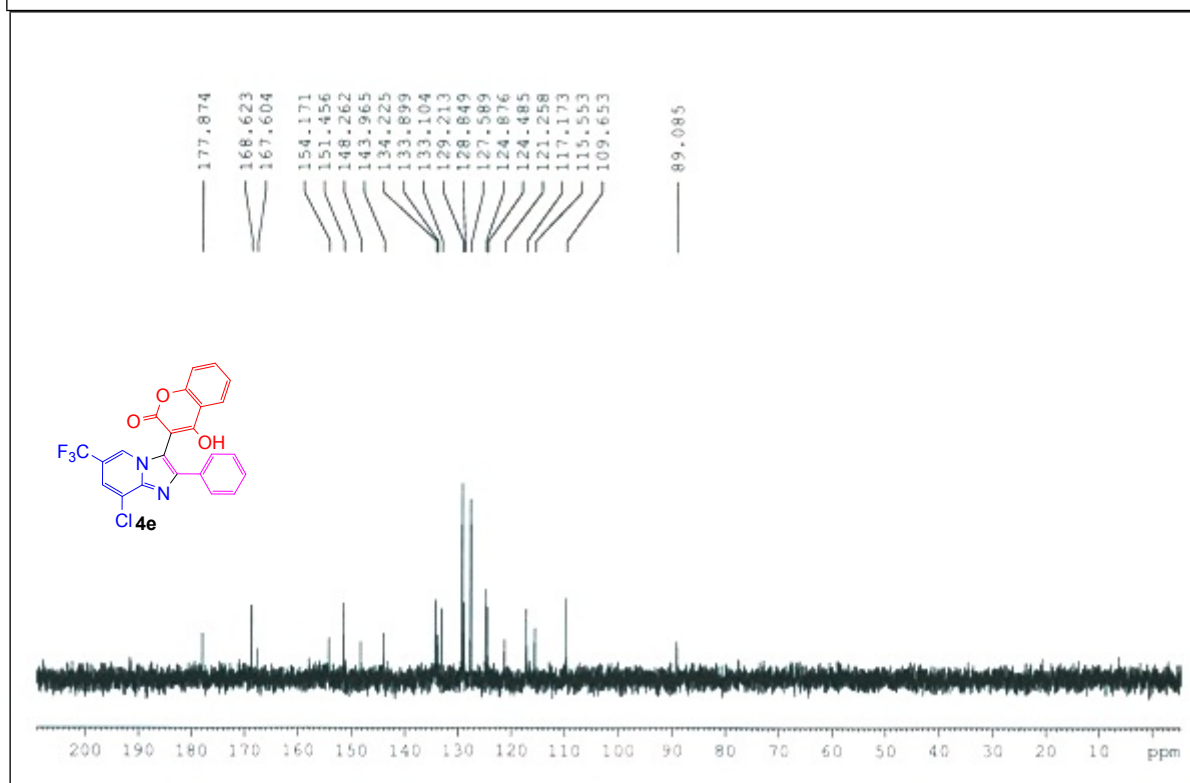

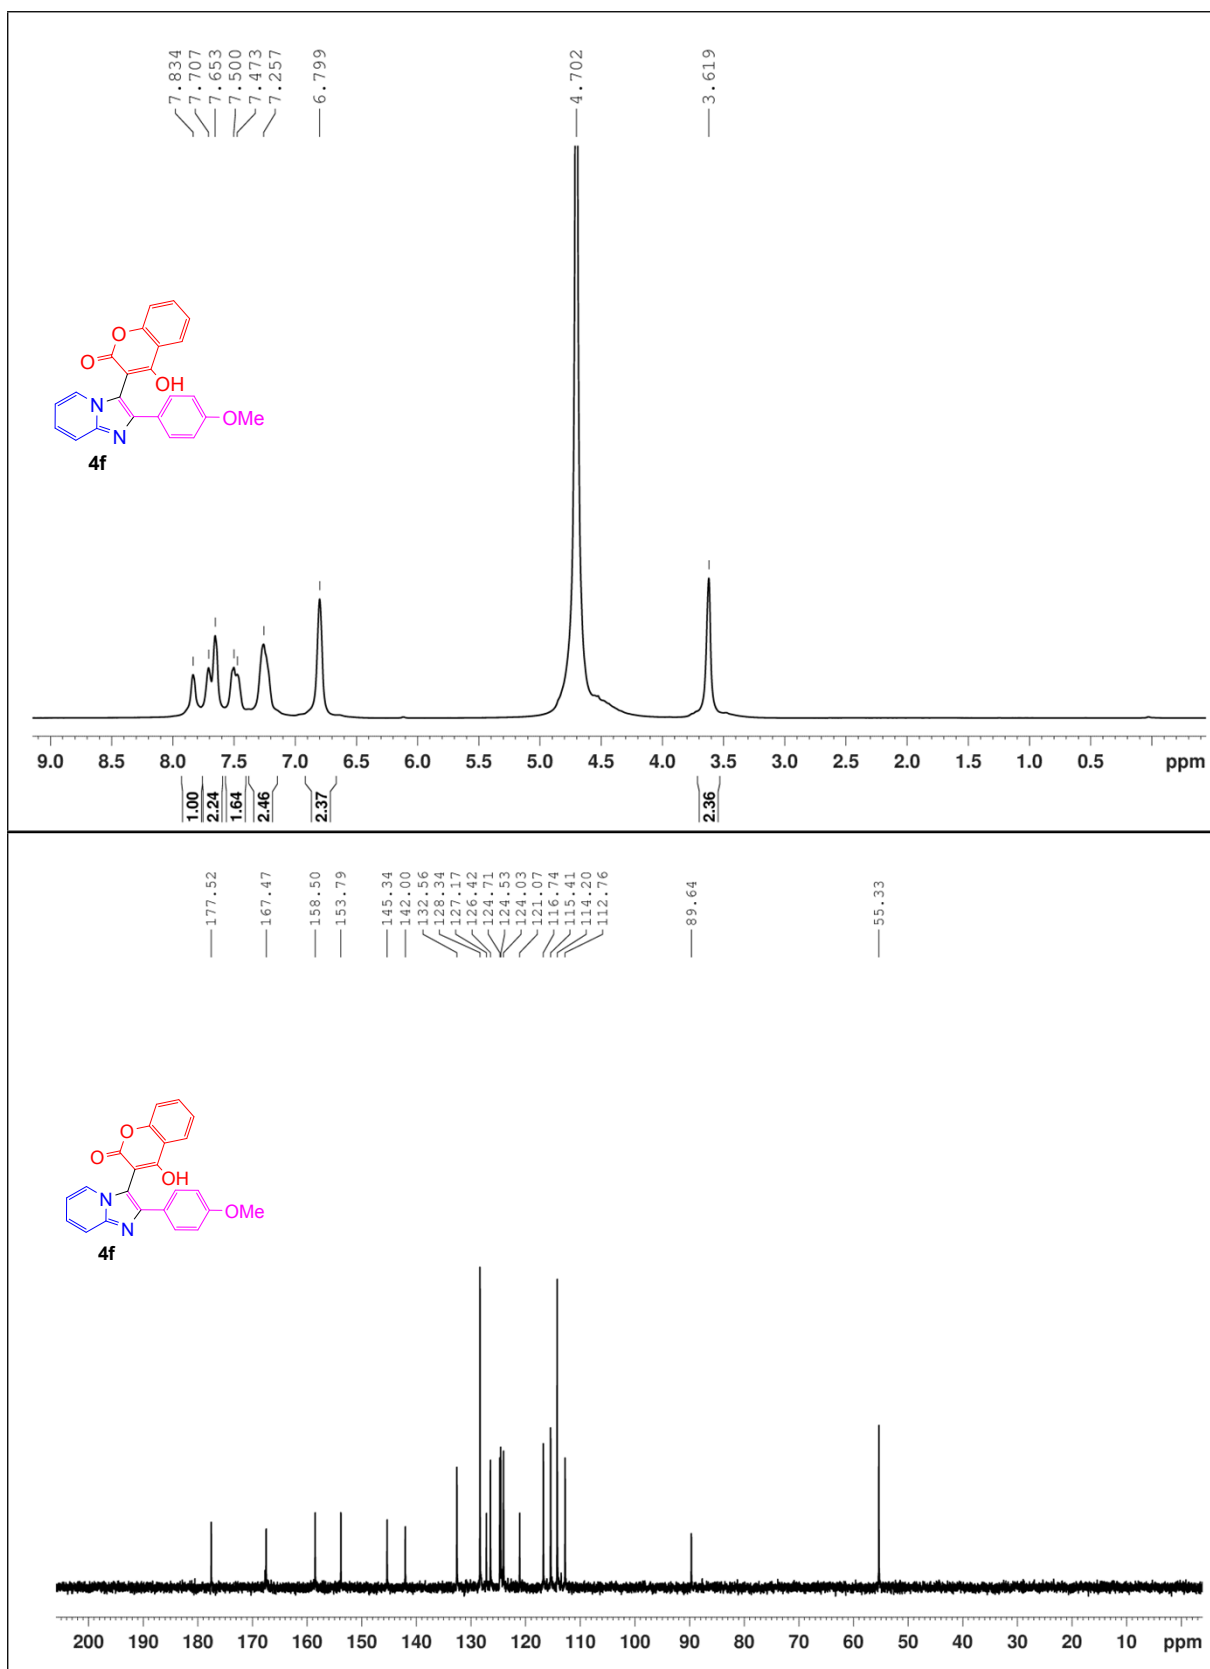



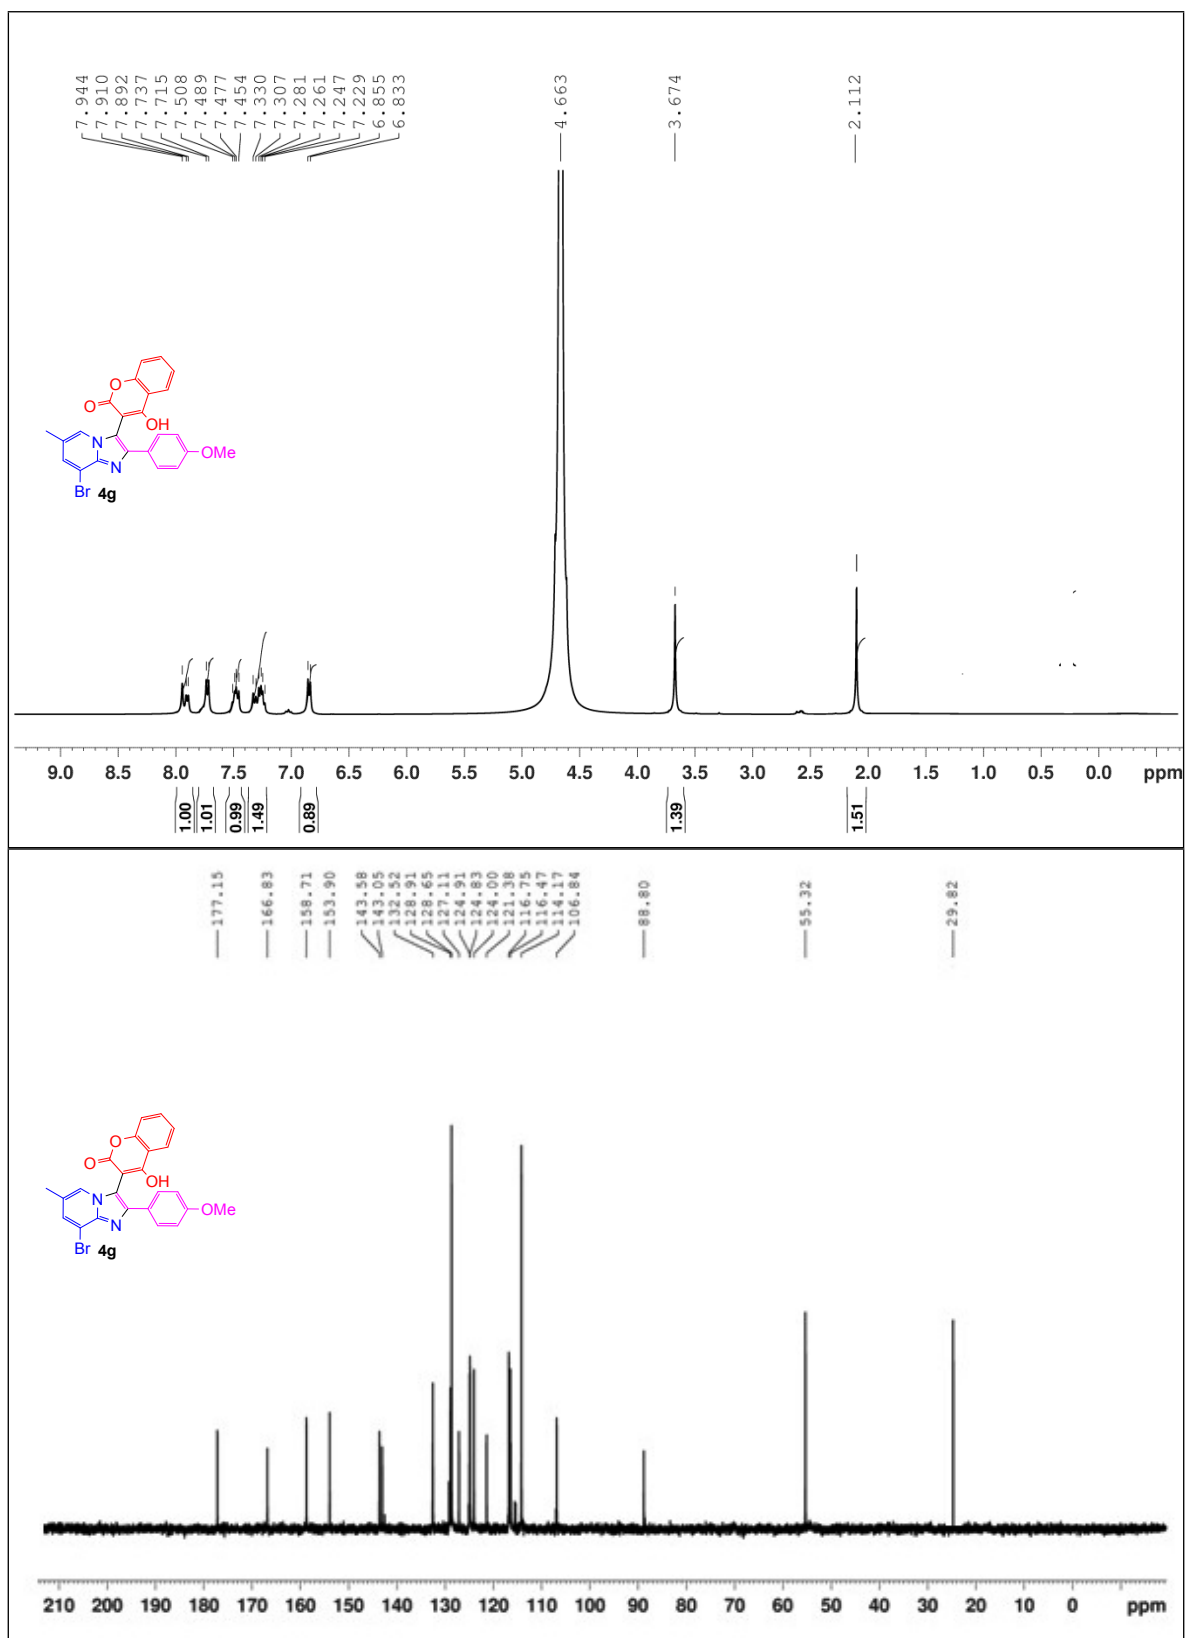

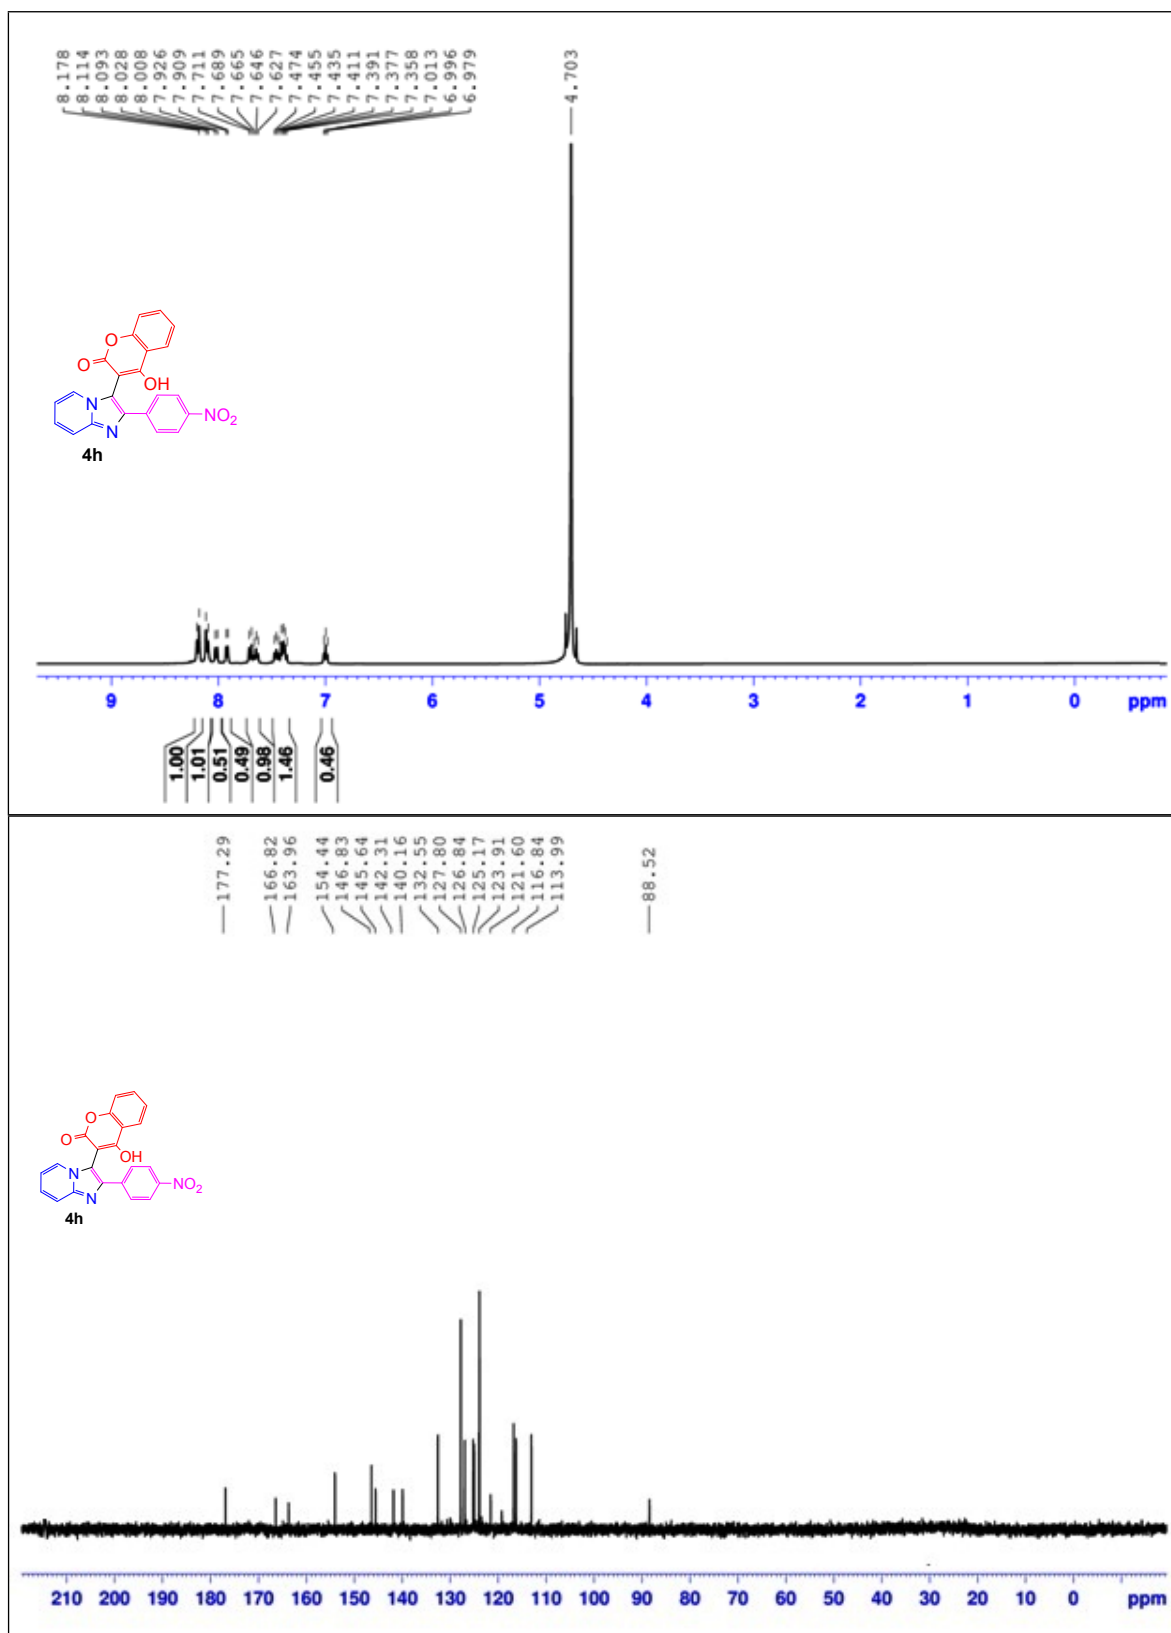

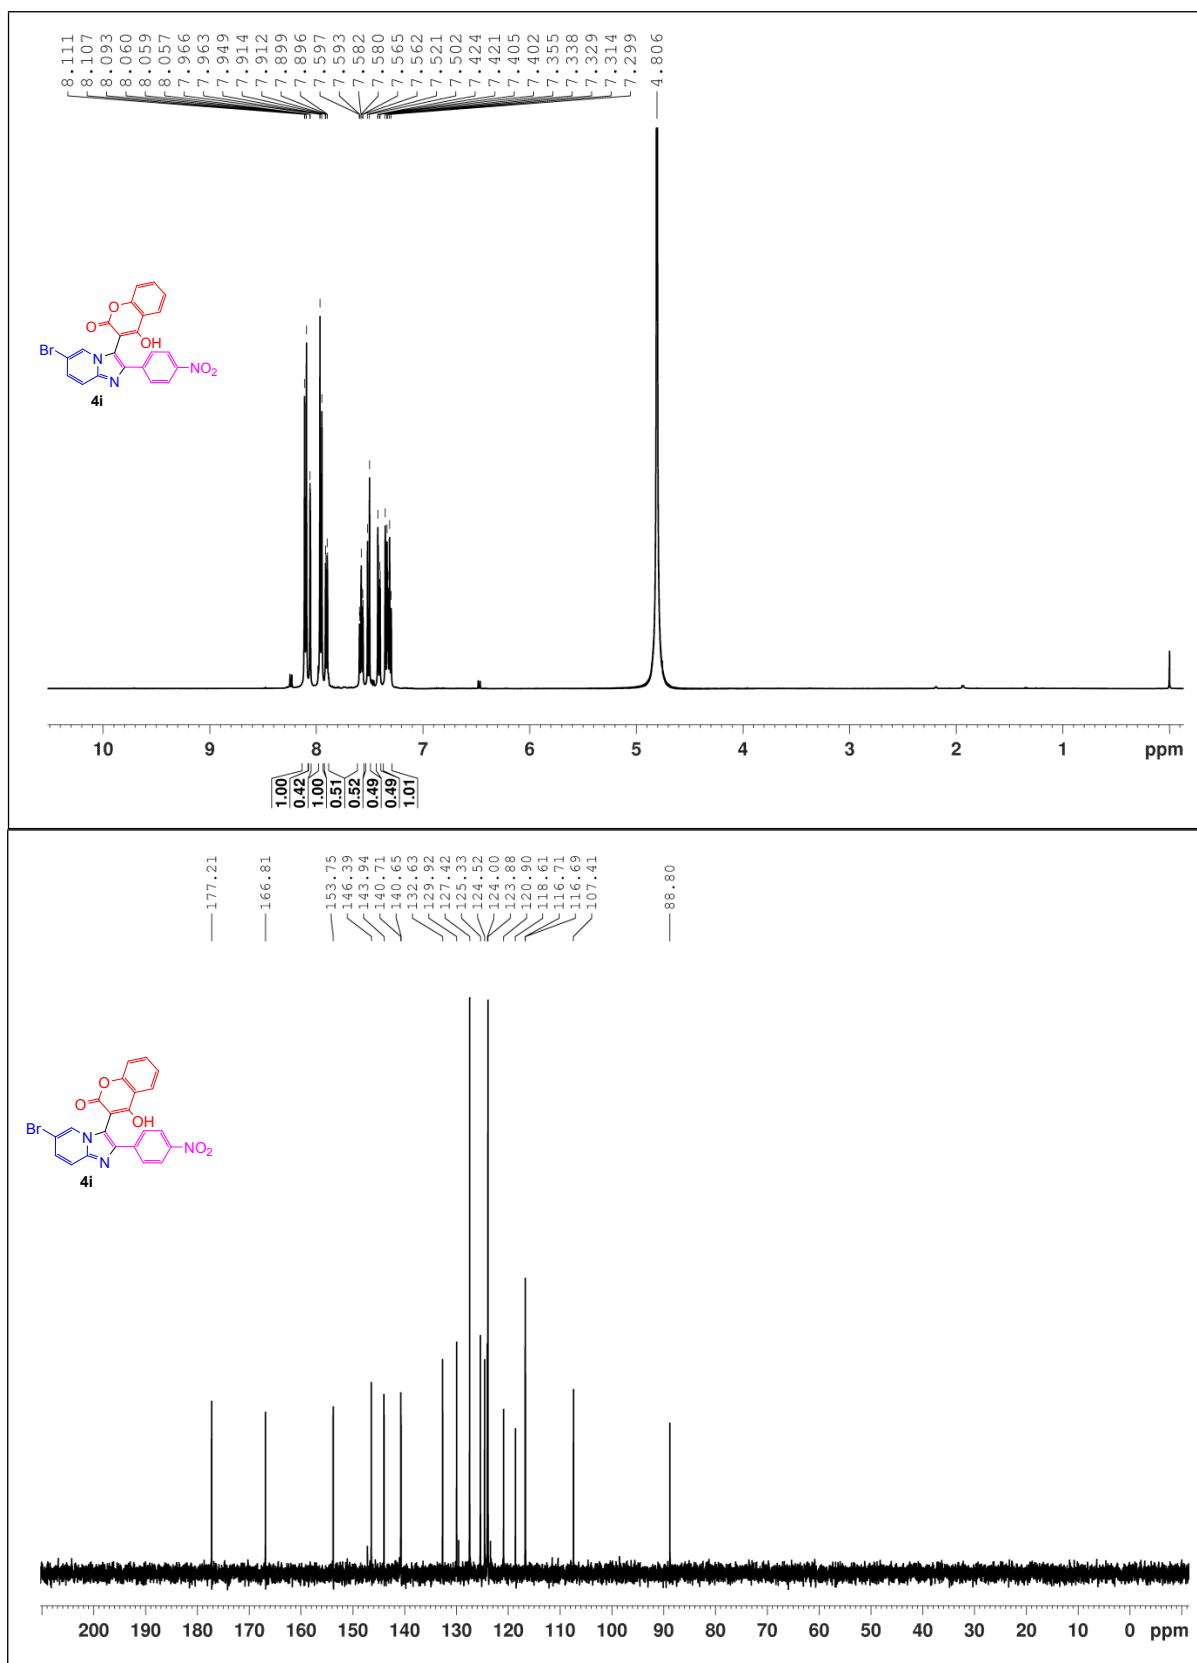

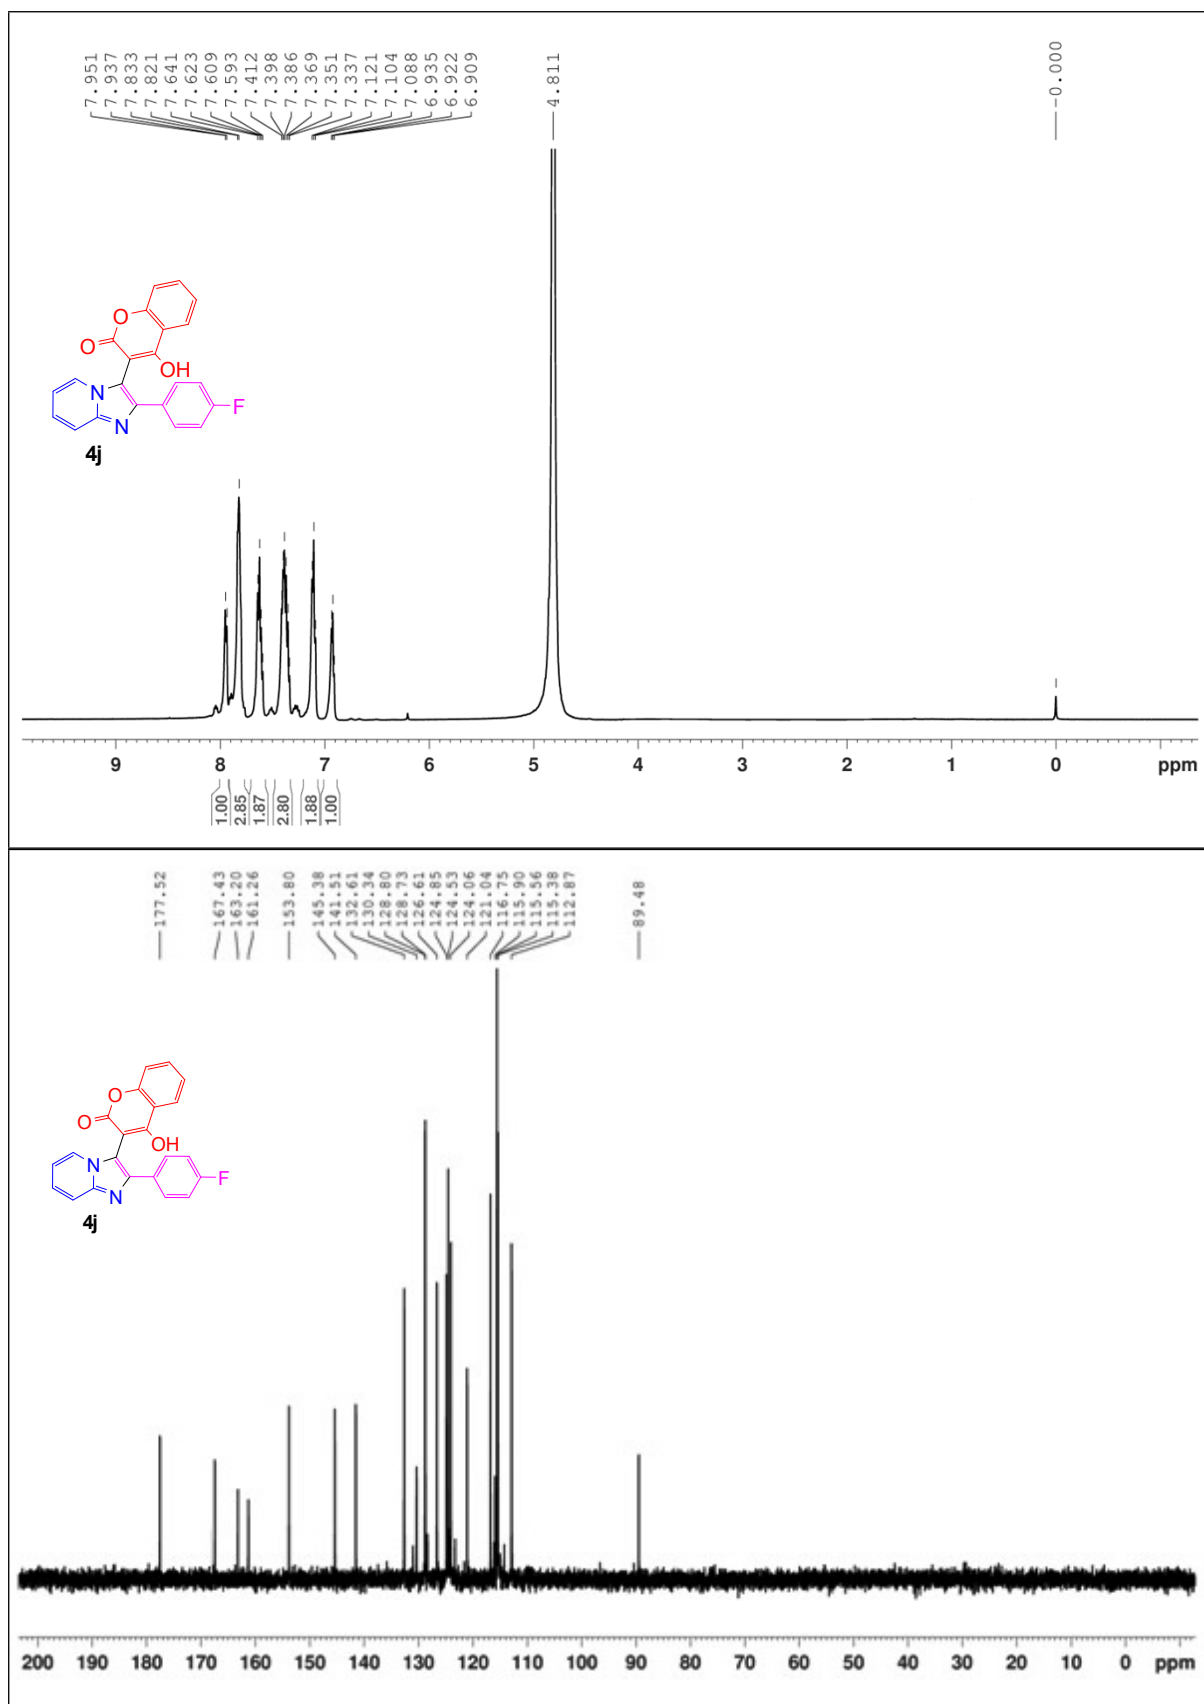

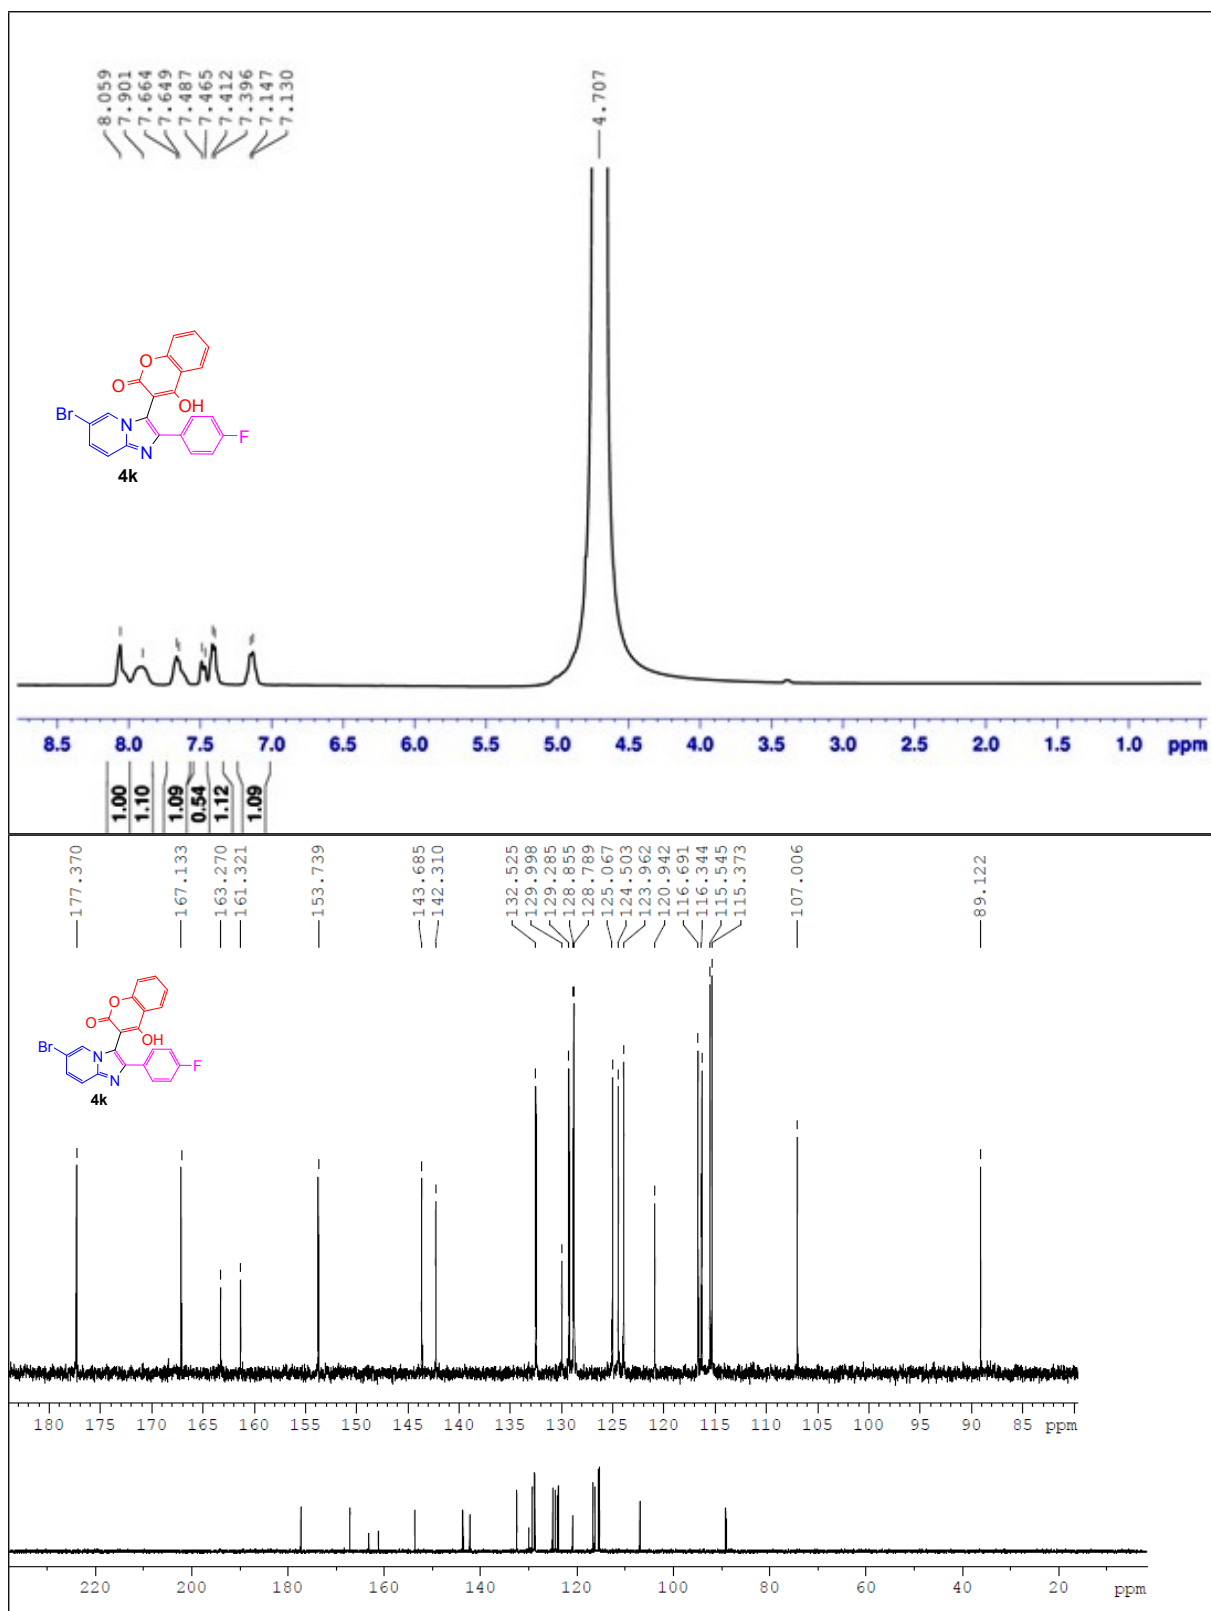

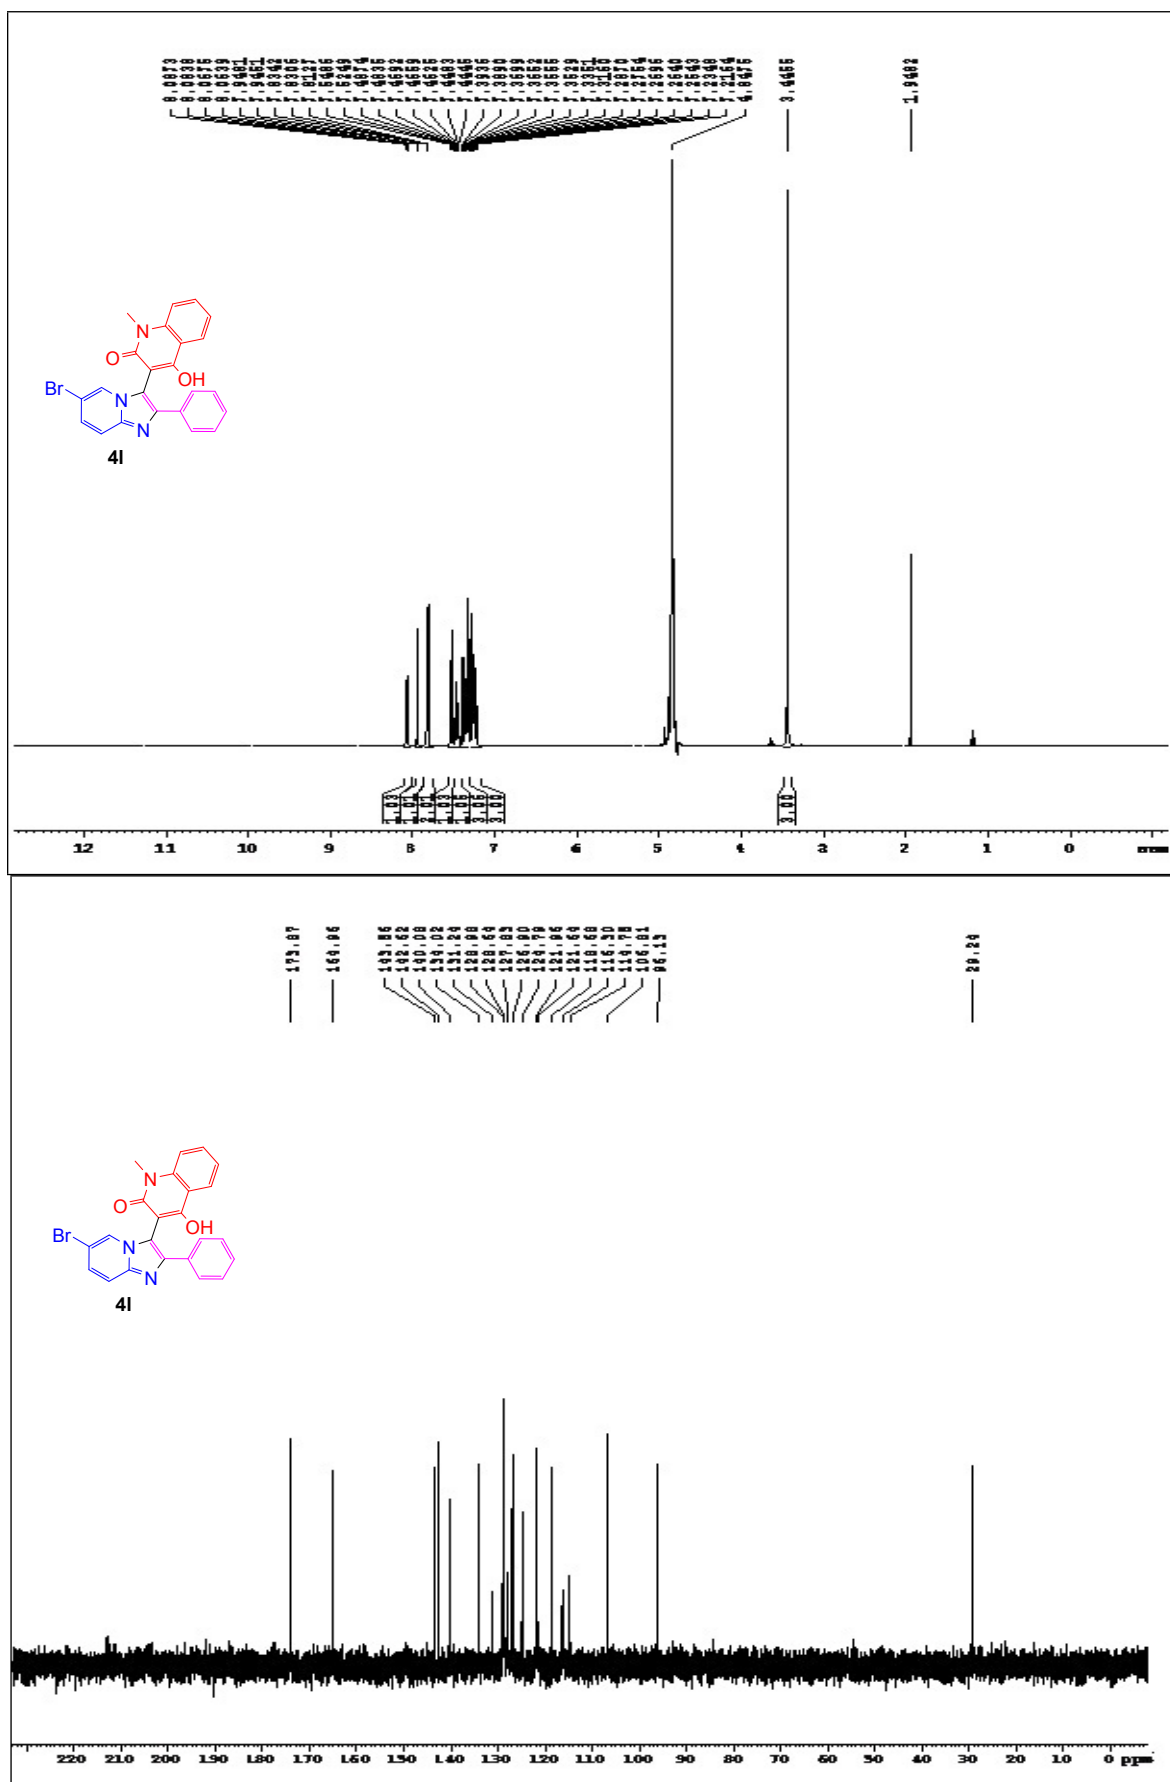

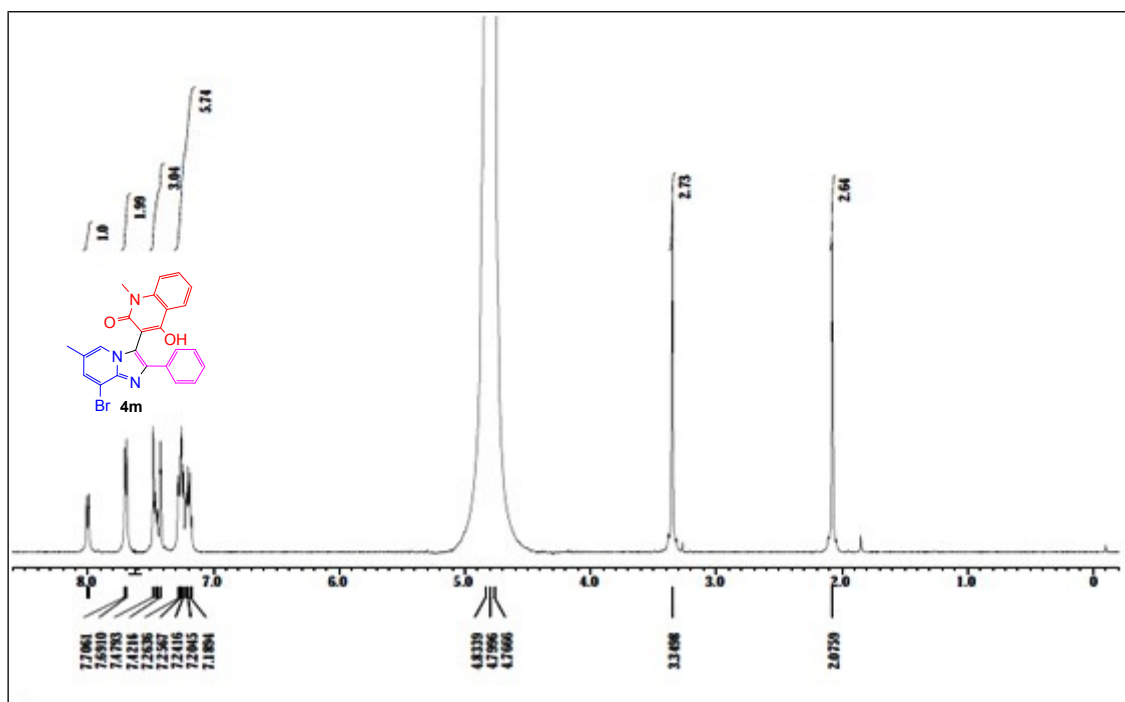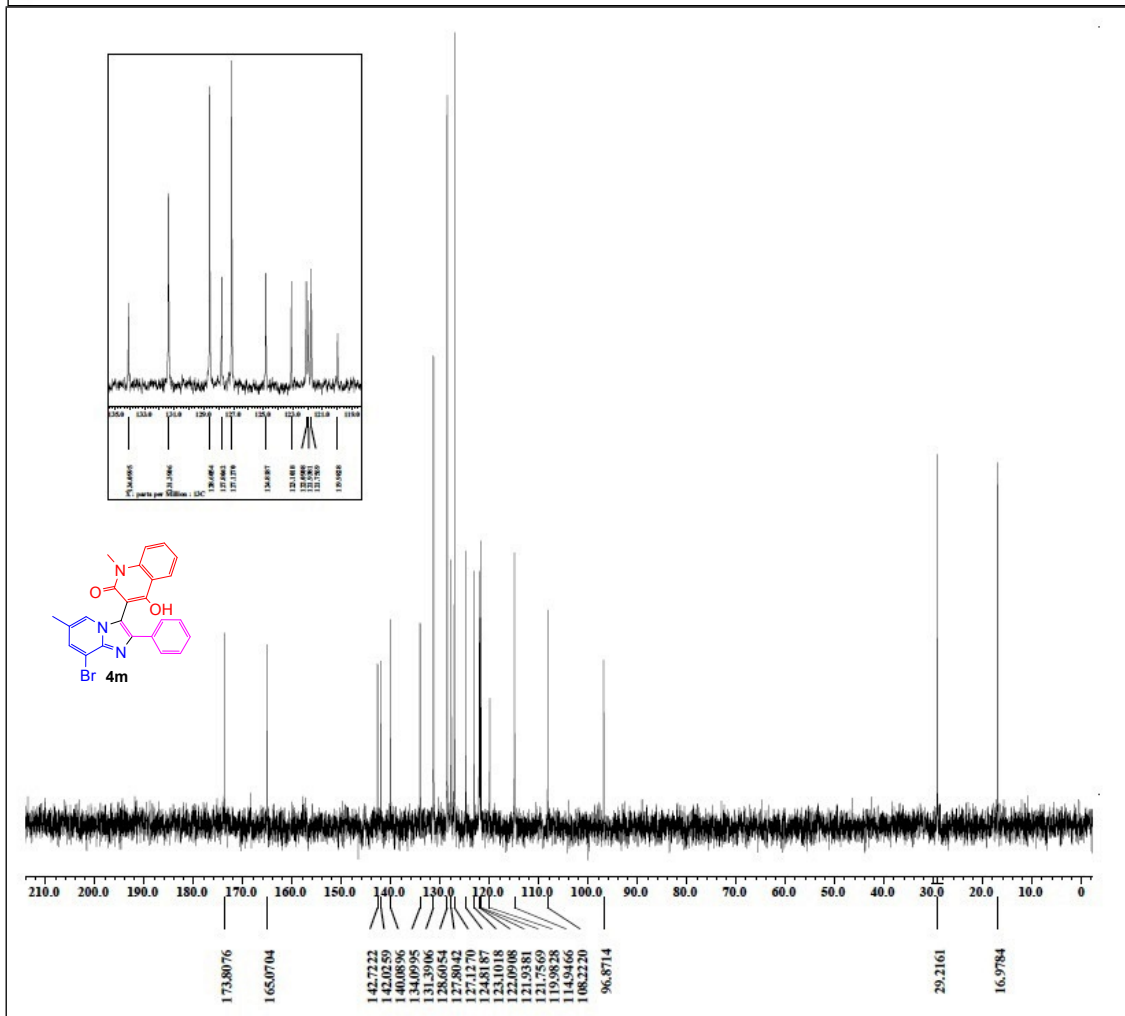





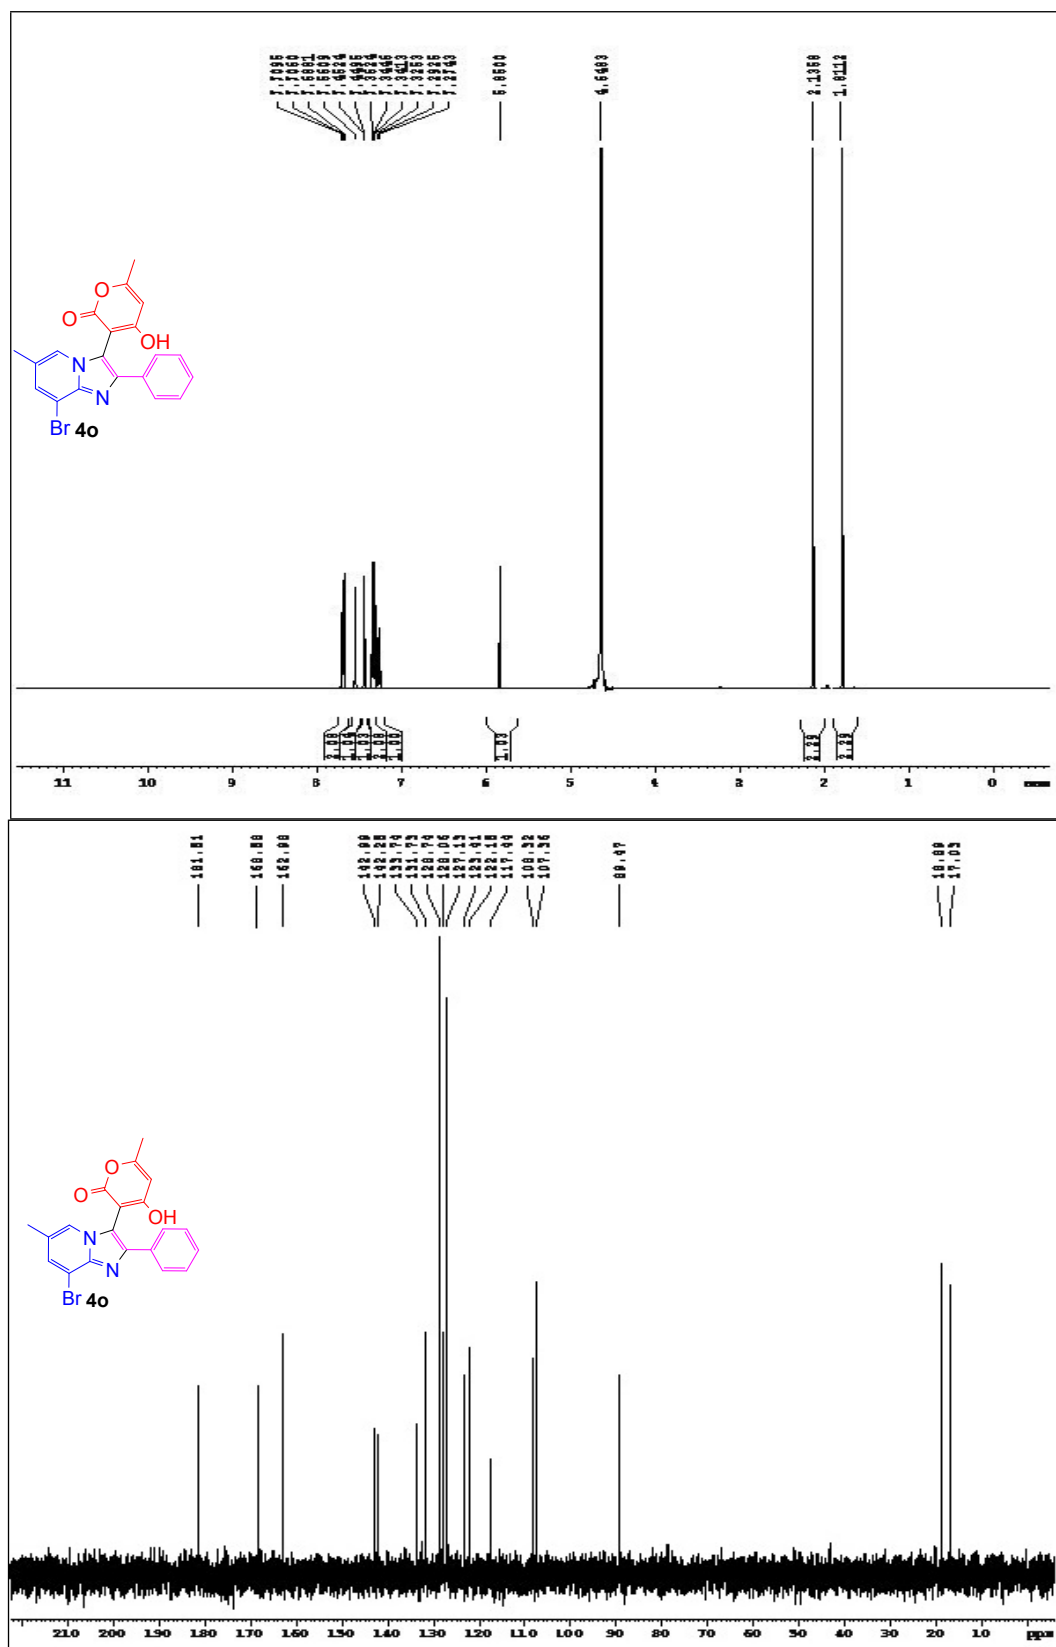

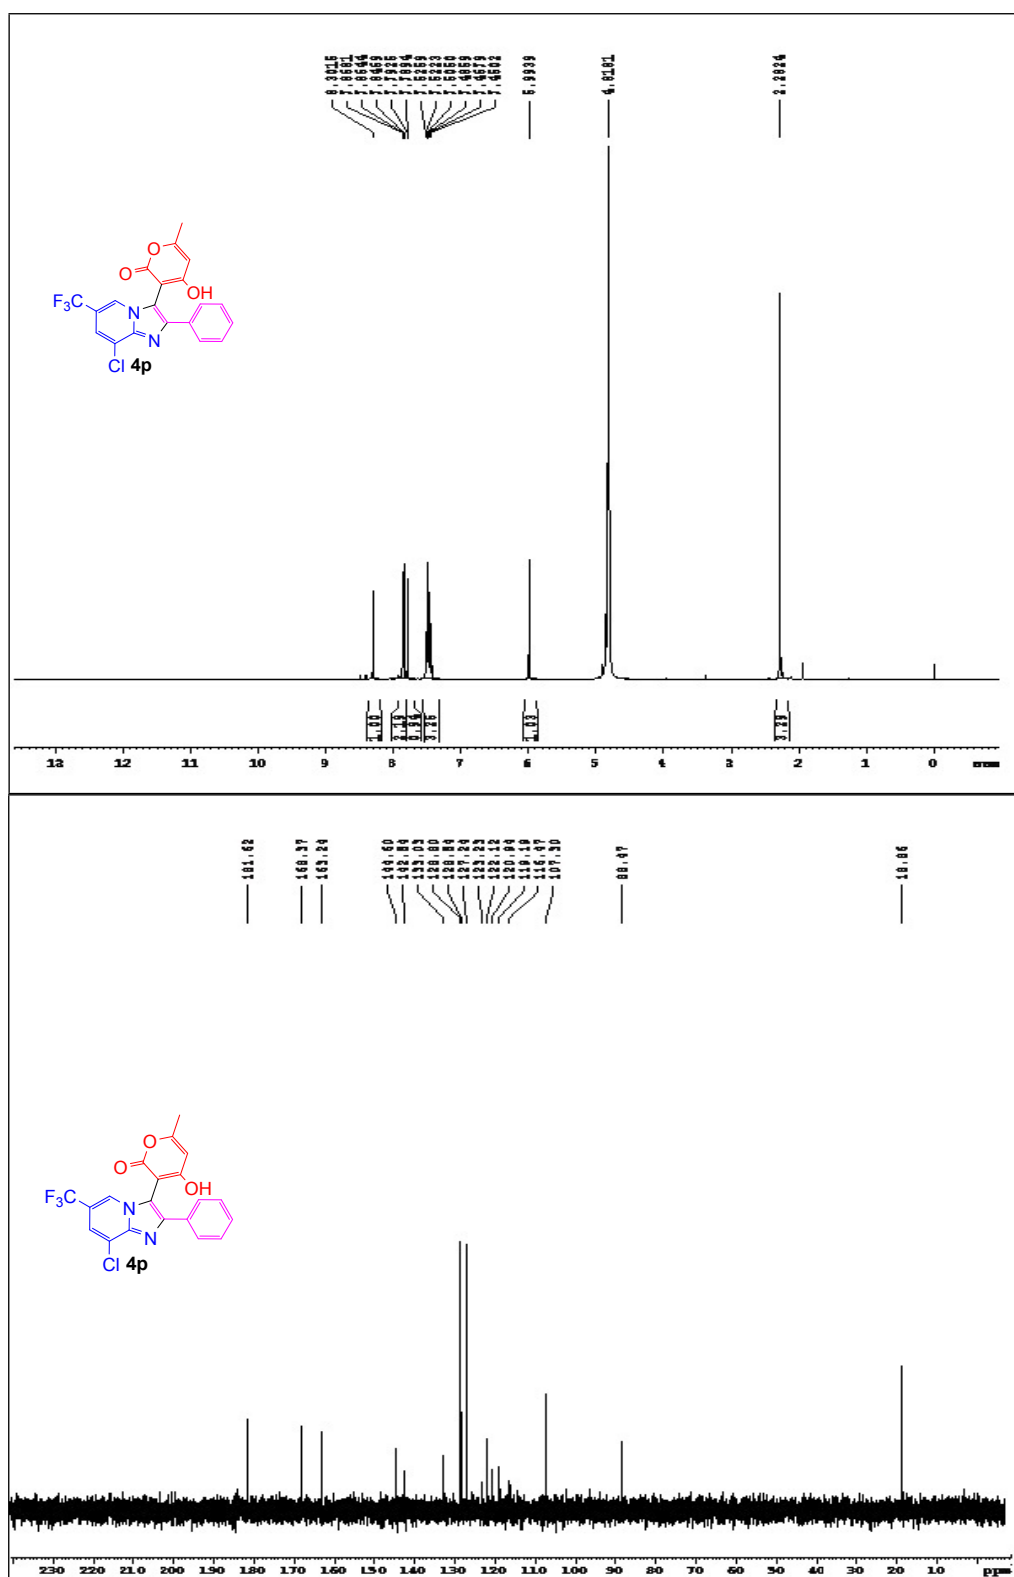

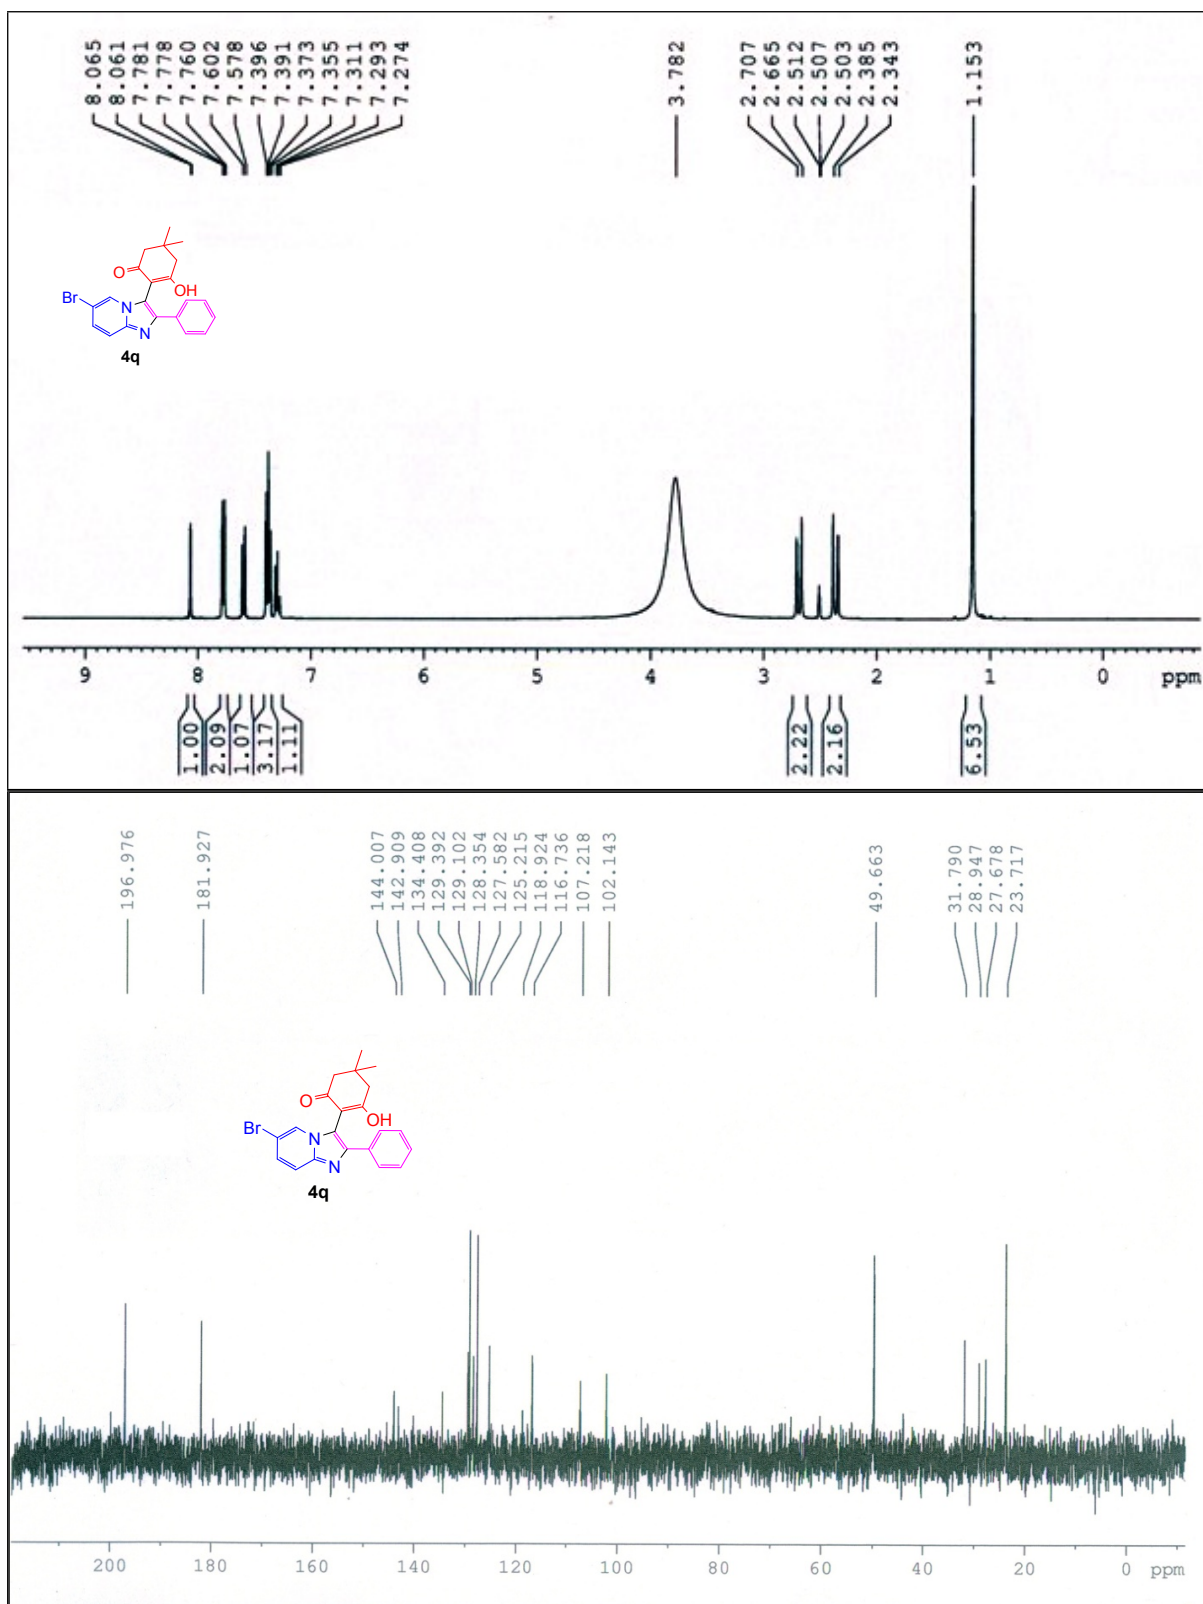



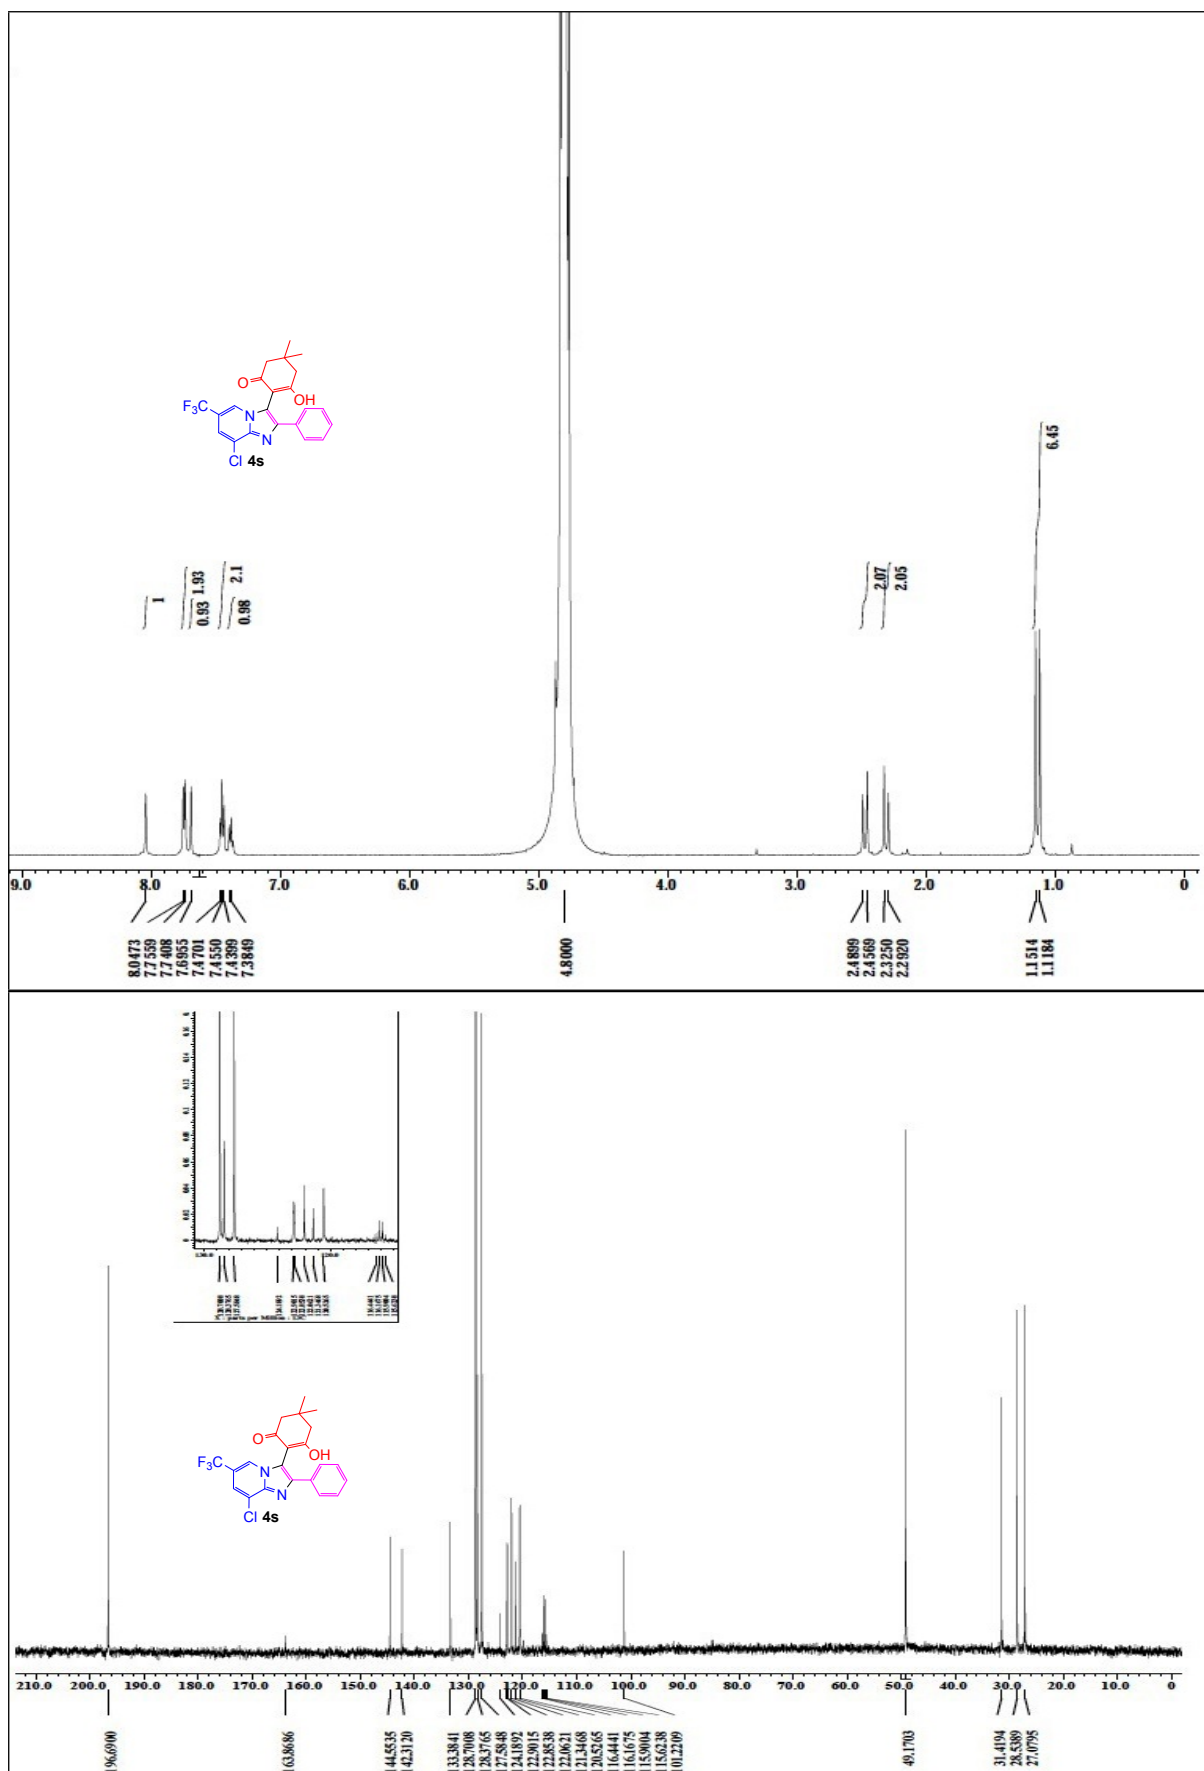

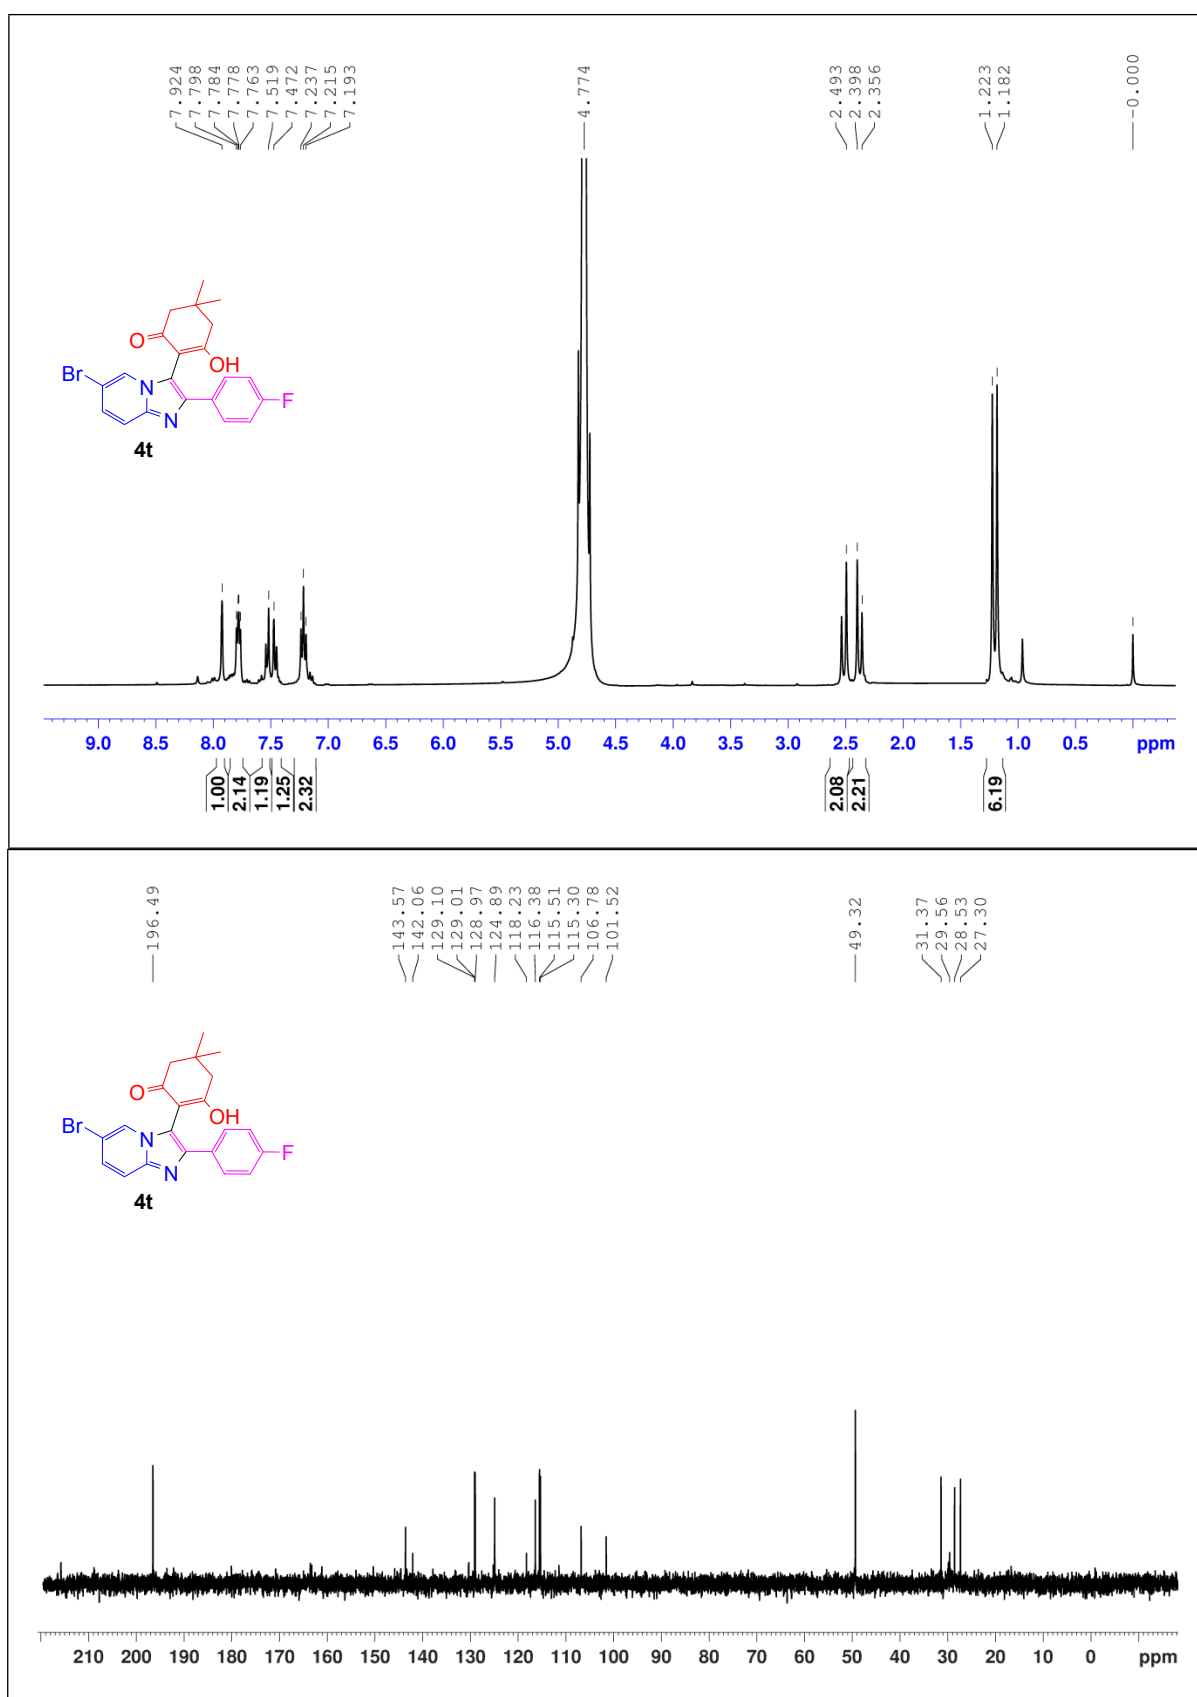

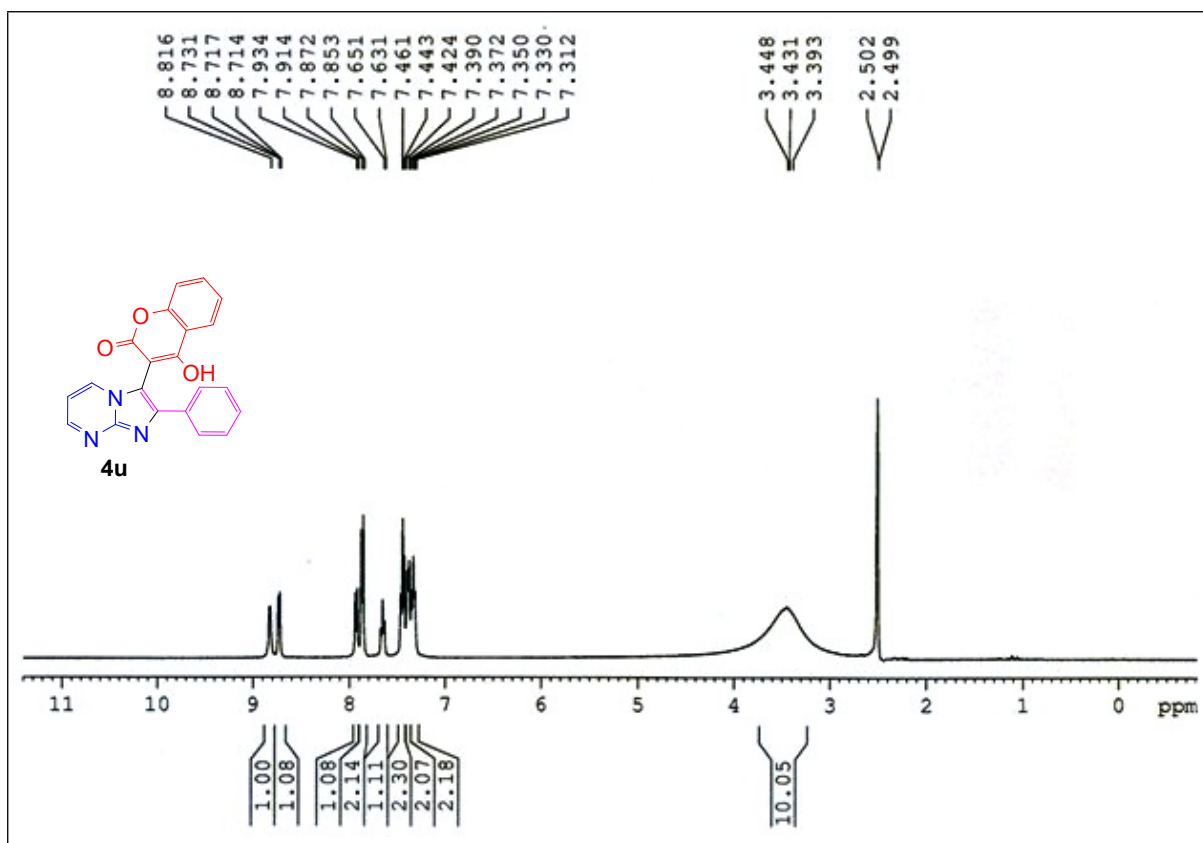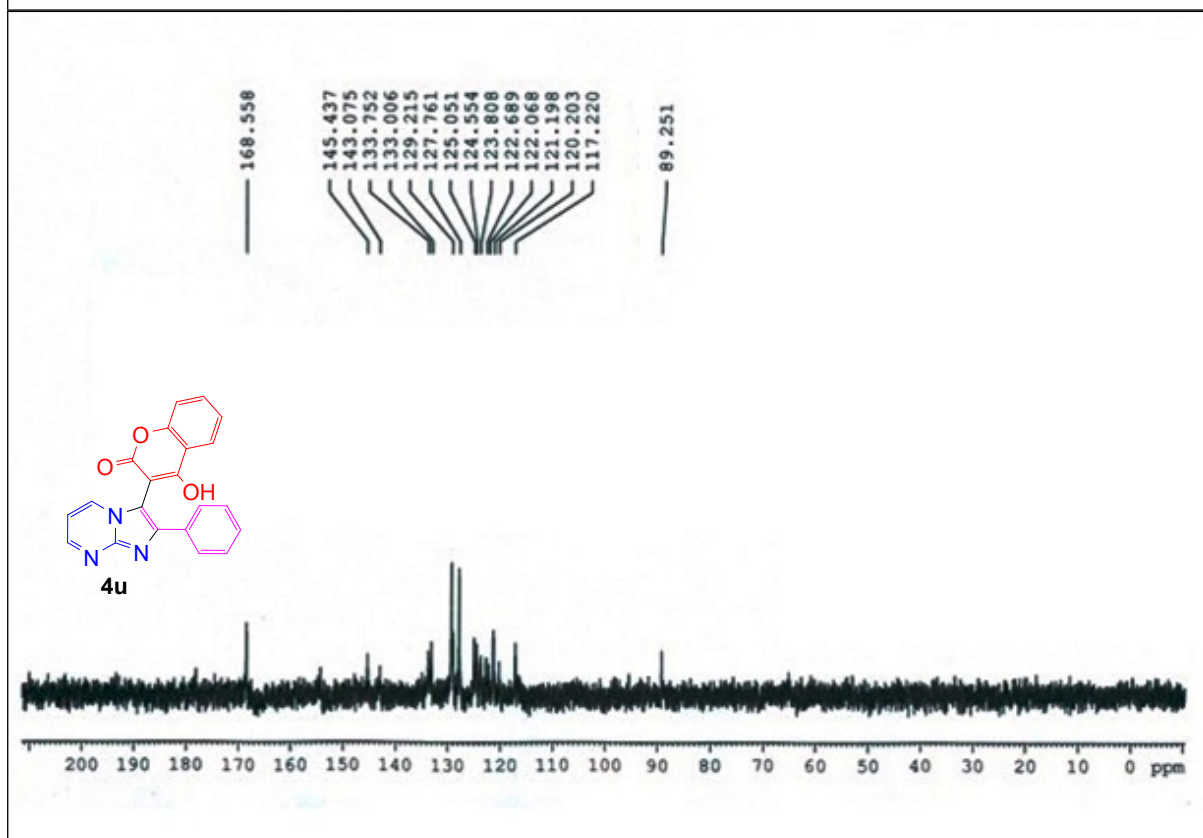

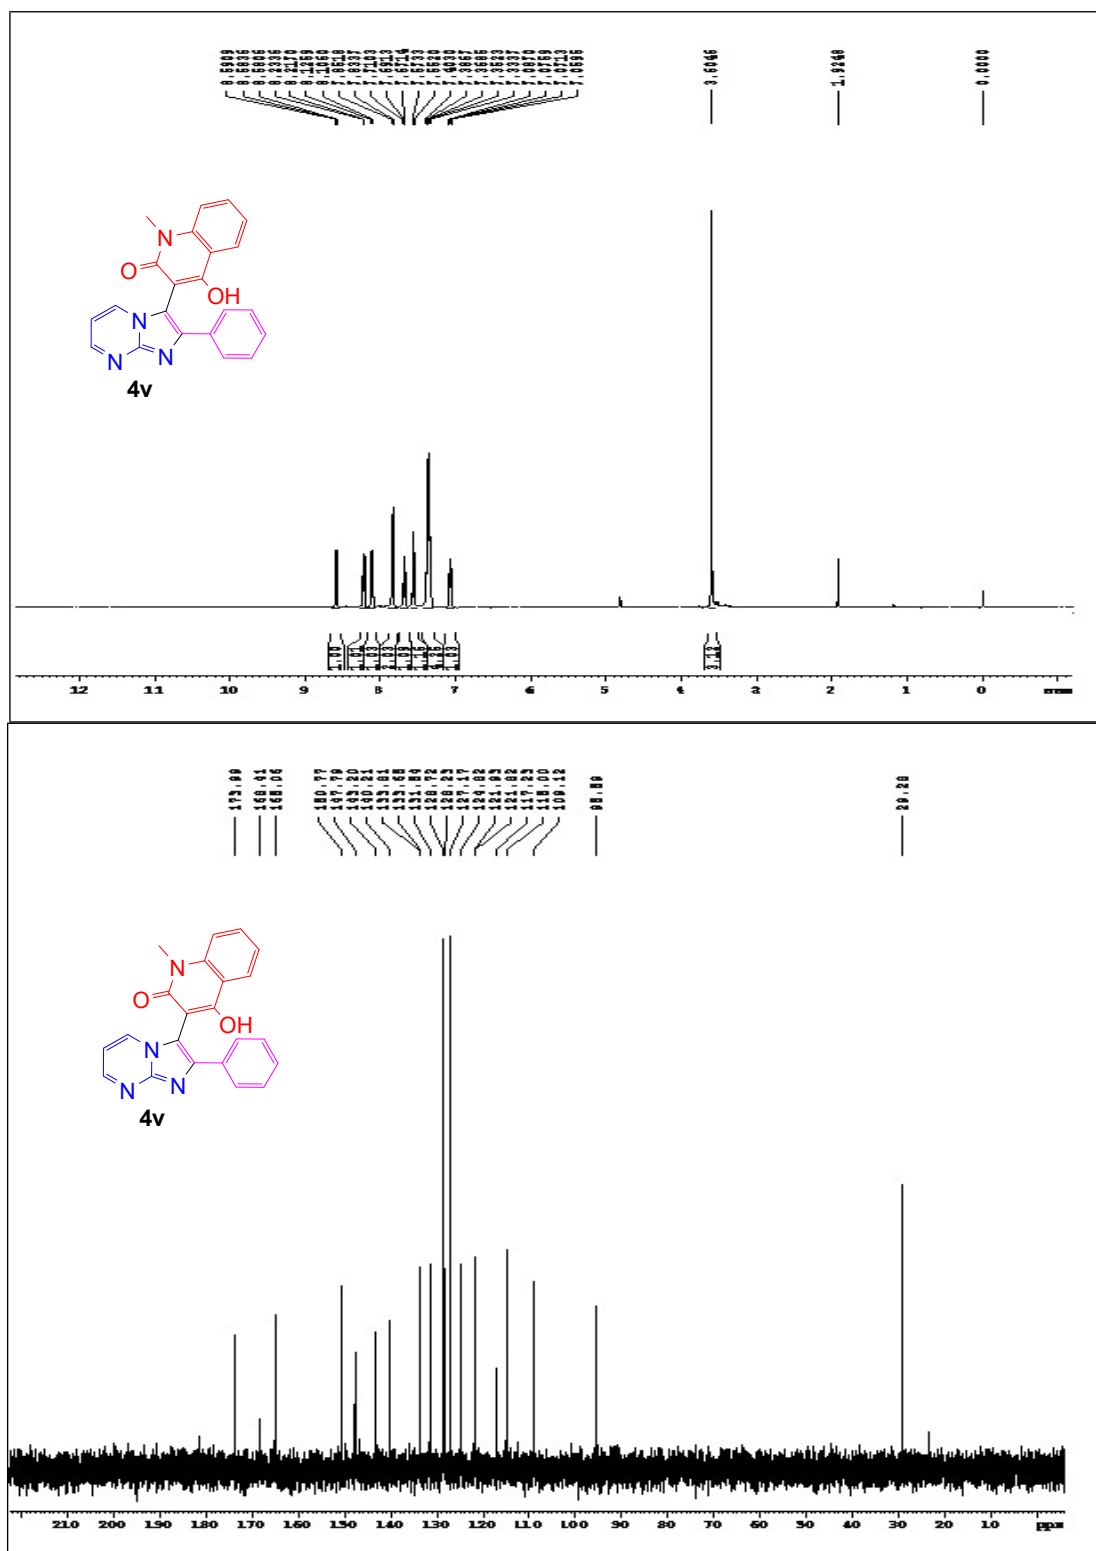

Supplement: c4ra16298f1.pdf [file c4ra16298f1.pdf]
